1 **Full title: Epidemiology and burden of respiratory syncytial virus in Italian**  
2 **adults: A systematic review and meta-analysis**

3  
4 **Short title: Epidemiology and burden of RSV in Italian adults**

5  
6 Alexander Domnich<sup>1</sup>, Giovanna Elisa Calabrò<sup>2</sup>

7  
8 1 Hygiene Unit, San Martino Policlinico Hospital-IRCCS for Oncology and Neurosciences, Genoa, Italy,

9 2 Section of Hygiene, Department of Life Sciences and Public Health, Università Cattolica del Sacro Cuore,  
10 Rome, Italy.

11  
12 **Correspondence:** Alexander Domnich, San Martino Policlinico Hospital-IRCCS for Oncology and  
13 Neurosciences, Largo Rosanna Benzi 10, 16132 Genoa, Italy. Email: [alexander.domnich@hsanmartino.it](mailto:alexander.domnich@hsanmartino.it)

## 14 **Abstract**

15

### 16 **Objective**

17

18 Respiratory syncytial virus (RSV) is a common respiratory pathogen not only in children, but also in adults.  
19 Country-specific data on the epidemiology and burden of disease are essential for policy decisions. In view of  
20 a recent authorization of adult RSV vaccines, we aimed to comprehensively collect and assess evidence on  
21 the epidemiology and burden of RSV in Italian adults.

22

### 23 **Methods**

24

25 A systematic literature review was conducted according to the available guidelines. Random-effects  
26 proportional meta-analysis was performed to obtain pooled estimates and the observed heterogeneity was  
27 investigated by using both subgroup and meta-regression analyses.

28

### 29 **Results**

30

31 A total of 35 studies were identified. RSV seasonal attack rates ranged from 0.8 ‰ in community-dwelling  
32 older adults to 10.9% in hematological outpatients. On average, 4.5% (95% CI: 3.2–5.9%) of respiratory  
33 samples tested positive for RSV. This positivity prevalence was higher in older adults (4.4%; 95% CI: 2.8–  
34 6.3%) than in working-age adults (3.5%; 95% CI: 2.5–4.6%) and in outpatient (4.9%; 95% CI: 3.1–7.0%) than  
35 inpatient (2.9%; 95% CI: 1.5–4.8%) settings. Study location and sample size were also significant predictors  
36 of RSV detection frequency. The pooled estimate of in-hospital mortality was as high as 7.2% (95% CI: 4.7–  
37 10.3%). However, other important indicators of the diseases burden, such as complication and hospitalization  
38 rates, are missing.

39

### 40 **Conclusion**

41

42 RSV poses a measurable burden on Italian adults, especially those of older age and with some co-morbidities.  
43 Policy makers should give priority to health technology assessment of the novel RSV vaccines.

44

- 45 **Keywords:** Respiratory syncytial virus; RSV; Epidemiology; Burden of disease; Adults; Older adults;
- 46 Systematic review; Italy

## 47        **1. Introduction**

48

49        Together with seasonal influenza, respiratory syncytial virus (RSV) is a leading cause of respiratory infections  
50        and is responsible for a significant socioeconomic burden in all age groups, especially at the extremes of age  
51        [1,2]. A recent modelling study [3] has estimated that on average, a total of 158,229 RSV-associated  
52        hospitalizations among European adults occur annually and 92% of these concerns the elderly. Contrary to  
53        young children, mortality attributable to RSV increased in both working-age and older adults [4].

54        Several systematic reviews and meta-analyses (SRMAs) [5–10] have investigated global epidemiology and  
55        burden of RSV in (older) adults. These reviews have advocated high incidence, hospitalization, mortality and  
56        case-fatality rates of RSV [5–10], which seem similar to seasonal influenza [9], and pointed out a substantial  
57        case under-ascertainment [10]. Moreover, there was a large between-country variation in estimates of the  
58        burden of disease (BoD) [6], which is driven by numerous factors, from climatic conditions [11] to the features  
59        of surveillance systems in place [12]. Notably, the available SRMAs [5–10] have identified only up to six studies  
60        conducted in Italy.

61        Two vaccines have been recently authorized to prevent lower respiratory tract disease (LRTD) caused by RSV  
62        in adults aged  $\geq 60$  years [13]. This age indication will be likely extended to younger individuals in the upcoming  
63        years. Some countries have already established RSV immunization policies. In the United States (US), a single  
64        dose of RSV vaccine is recommended to adults  $\geq 60$  years, as a part of shared clinical decision-making  
65        between patient and healthcare provider [14]. In the United Kingdom (UK), RSV vaccination is currently  
66        advised for older adults aged  $\geq 75$  years, being the most cost-effective option [15]. By contrast, as of November  
67        2023, no recommendations have been issued in Italy.

68        Understanding country-specific BoD is a key driver for policy decisions on the introduction of new vaccines  
69        [16]. A systematic appraisal of the burden of RSV enables policy makers, health professionals and other  
70        relevant stakeholders to make informed decisions regarding the recently available vaccines. In this regard,  
71        SRMAs on different BoD indicators are important in the description of spatiotemporal distribution and variations  
72        between population subgroups potentially targeted by the novel preventive measures [17,18]. Systematically  
73        appraised country-specific BoD indicators are also essential for all types of pharmaco-economic models.

74        In Italy, a recent review [19] has assessed RSV BoD in pediatric outpatients, also with the aim to inform  
75        decision makers on the recent availability of a monoclonal antibody for RSV prevention in neonates. By  
76        including six studies, the authors found that 18–41% of children with respiratory infections were positive for  
77        RSV. Conversely, no reviews have systematically assessed burden of RSV in Italian adults. Indeed, RSV

78 epidemiology is highly age-dependent, which hinders transferability of pediatric estimates to older populations.  
79 Furthermore, as we mentioned earlier, the available global-level reviews [5–10] were able to identify only a  
80 limited number of Italian studies. In this SRMA, we aimed to comprehensively collect and analyze available  
81 data on RSV epidemiology and BoD in Italian adults with the ultimate goal of informing and supporting National  
82 and local decision makers on the planification and implementation of vaccination strategies.

83

## 84 **2. Materials and methods**

85

### 86 **2.1. Reporting standards and protocol**

87

88 PRISMA (preferred reporting items for SRMAs) statement [20] was adopted as a reporting standard (S1 Table).  
89 Methodological guidance for systematic reviews of observational epidemiological studies reporting prevalence  
90 and cumulative incidence data developed by the Joanna Briggs Institute (JBI) [21] was also consulted. The  
91 study protocol was prospectively registered [22] and no amendments to the original protocol were made.

92

### 93 **2.2. Eligibility criteria**

94

95 All types of observational studies and published in any modality (e.g., peer-reviewed article, preprint,  
96 conference abstract, etc.) were potentially eligible. The CoCoPop (condition, context, and population)  
97 approach [21] was used to formulate the inclusion criteria. In particular, the condition of interest was RSV  
98 infection detected by any laboratory technique, including reverse-transcription polymerase chain reaction (RT-  
99 PCR), culture, immunofluorescence assay (IFA) and rapid antigen tests. Moreover, RSV-specific International  
100 Statistical Classification of Diseases and Related Health Problems (ICD) diagnosis codes (see below) were  
101 also considered a good proxy for the true RSV infection, since their specificity is as high as 99.6–99.8% [23,24].  
102 For the context, we considered studies conducted in Italy, in any setting (outpatient, inpatient or mixed), time  
103 and calendar period. Population consisted of adults defined as individuals aged  $\geq 14$  years, independently of  
104 their health conditions. Any reason or clinical entity [e.g., influenza-like illness (ILI), acute respiratory infection  
105 (ARI), severe ARI (SARI), clinical request for differential diagnosis] that triggers collection of biological samples  
106 (upper respiratory tract specimens including naso/oropharyngeal and nasal swabs; lower respiratory tract  
107 specimens including sputum, bronchoaspirates and bronchoalveolar lavage fluids) was eligible.

108 The following were set as exclusion criteria: (i) modeling, pharmaco-economic and similar studies with no  
109 original data; (ii) insufficient data on RSV; (iii) studies on general population with no separate data for adults;  
110 (iv) multi-country studies with no separate data for Italy; (v) redundant publications.

111

### 112 **2.3. Study endpoints**

113

114 RSV attack rate (cumulative incidence) was defined as the occurrence of laboratory-confirmed RSV detection  
115 in a population (symptomatic, asymptomatic or both) and in a specific period. RSV positivity prevalence was  
116 defined as proportion of RSV detections to the number of subjects tested. Prevalence of viral co-detections  
117 was described as number of samples tested positive for both RSV and any other respiratory virus to the total  
118 number of RSV-positive samples. Case-complication rate was defined as proportion of subjects who tested  
119 positive for RSV and developed  $\geq 1$  complication, such as pneumonia, exacerbation of chronic obstructive  
120 pulmonary disease (COPD), asthma, congestive heart failure, and other. As for drug use indicators, we  
121 considered frequency of antibiotic prescriptions among RSV-positive subjects. For what concerns inpatient  
122 outcomes, crude hospitalization, case-hospitalization (i.e., proportion of RSV-positive individuals who were  
123 hospitalized) rates, length of stay [mean with standard deviation (SD) or median with interquartile range (IQR)]  
124 and frequency of admission to intensive care units (ICUs) were of interest. Analogously, crude, in-hospital, 30-  
125 day mortality and case-fatality rates were eligible. For the indicators based on hospital discharge records  
126 (HDRs) or death certificates, we considered only RSV-specific codes, namely RSV pneumonia (ICD-9: 480.1;  
127 ICD-10: J12.1), acute bronchiolitis due to RSV (ICD-9: 466.11; ICD-10: J21.0), acute bronchitis due to RSV  
128 (ICD-10: J20.5), and RSV as the cause of diseases classified elsewhere (ICD-9: 079.6; ICD-10: B97.4).

129 When possible, all study endpoints were described overall, by age-group (working-age and older adults), RSV  
130 subtype (A and B) and season.

131

### 132 **2.4. Search strategy**

133

134 The automatic search was performed on 22 November 2023 in the following databases: (i) MEDLINE via Ovid;  
135 (ii) Biological Abstracts via Ovid; (iii) Global Health via Ovid; (iv) Scopus and (v) Web of Science. In order to  
136 increase sensitivity, no filters or other restrictions (e.g., language or publication year) were applied. The search  
137 script considered both MeSH (medical subject headings) and text-wide terms and is reported in S2 Table.

138 We then performed a manual search through several modalities. First, the reference lists of the available  
139 global-level SRMAs [5–10] were checked. Second, a backward cross-reference checking of the included  
140 studies was carried out. Third, a forward citation search by using Google Scholar (<https://scholar.google.com/>)  
141 was conducted, as this search engine is better suited for identifying grey literature sources [25]. Fourth,  
142 periodic reports of the Italian surveillance reports on influenza and other respiratory viruses  
143 (<https://respirnet.iss.it>) were examined. Finally, we screened abstract books and proceedings of some  
144 relevant conferences, including ECCMID (European Society of Clinical Microbiology and Infectious Diseases),  
145 ESWI (European Scientific Working Group on Influenza) and ReSViNET.

146

## 147 **2.5. Study selection**

148

149 Results produced by the automatic search were merged into a single spreadsheet and duplicates were  
150 removed. The resulting list of unique records underwent screening by assessing titles and/or abstracts and  
151 clearly irrelevant citations were discarded. Full texts of potentially pertinent publications were then downloaded  
152 and assessed for the above-described eligibility criteria. Study selection was finalized by performing the  
153 manual search, as described earlier. The entire process of study selection was performed by both reviewers,  
154 each working independently; eventual disagreements were solved by consensus.

155

## 156 **2.6. Data extraction and abstraction**

157

158 The following data were extracted: (i) full citation record; (ii) study location; (iii) study period; (iv) study design;  
159 (v) study setting; (vi) main characteristics of the study population; (vii) sample size; (viii) funding source; (ix)  
160 eligibility criteria and case definitions; (x) methods used for case ascertainment; (xi) numerators and  
161 denominators used to compute the endpoints of interest described above; (xii) other potentially relevant  
162 information.

163 On the basis of period, studies were dichotomized on whether they overlapped with the COVID-19 pandemic,  
164 which had a significant impact on the circulation of RSV and other respiratory viruses. In particular, the northern  
165 hemisphere winter season 2020/2021 was characterized by a very limited circulation of RSV [19,26]. Estimates  
166 for that season were extracted, but not included in the quantitative synthesis. Starting from the 2021/2022  
167 season, RSV returned to the epidemiological scene [26] and therefore estimates from 2021/2022 onwards  
168 were fully considered. Multi-season studies that reported separate seasonal data were considered as distinct

169 estimates [27]. Moreover, we distinguished between year-around studies and those conducted during a typical  
170 RSV season, in which the probability of RSV detection is much higher [28]. We defined RSV epidemic season  
171 as a period between October and April [26].

172 On the basis of sample size, studies were median split. Regions of were categorized into three macro-areas  
173 of North (Aosta Valley, Liguria, Lombardy, Piedmont, Emilia-Romagna, Friuli-Venezia Giulia, Trentino-South  
174 Tyrol, Veneto), Center (Lazio, Marche, Tuscany, Umbria) and South (Abruzzo, Apulia, Basilicata, Calabria,  
175 Campania, Molise, Sicily, Sardinia).

176 Missing data on relevant numerators and/or denominators were handled as follows. First, the corresponding  
177 author was contacted for clarification. In case of no reply, these data were imputed from the available  
178 percentages and/or by extracting data from figures using the WebPlotDigitizer v.4.6 software  
179 (<https://automeris.io/WebPlotDigitizer>). Data were extracted by AD and then validated by GEC.

180

## 181 **2.7. Critical appraisal**

182

183 The JBI checklist for prevalence studies [21] was used to assess quality of the included studies. It was  
184 assessed independently by both reviewers and eventual conflicts were solved by consensus. Item 9 of the JBI  
185 checklist on the response rate was judged irrelevant for this study. Owing to a limited information available,  
186 risk of bias of conference abstracts, letters to the editor, short communications and similar was not assessed.

187

## 188 **2.8. Data synthesis**

189

190 Tabulated data were first reassumed qualitatively and by visualizing forest plots. For quantitative synthesis, a  
191 proportional meta-analysis was undertaken according to the available recommendations [18,21]. As  
192 heterogeneity was expected to be high, random-effects (RE) models with double arcsine transformation to  
193 stabilize variances were used. Pooled estimates were expressed as proportions with 95% Clopper-Pearson  
194 confidence intervals (CIs). Heterogeneity was quantified by means of the  $\tau^2$  and  $I^2$  statistics. Notably, high  $I^2$   
195 values do not necessarily mean that the data are inconsistent, as true heterogeneity is expected in prevalence  
196 estimates due to spatiotemporal differences [18]. The 95% prediction intervals (PIs) were also computed. As  
197 recommended, publication bias was not formally assessed, since there is no consensus about what a positive  
198 result in meta-analyses of proportions is [18].



199 To investigate the sources of heterogeneity across studies, both subgroup and meta-regression analyses were  
200 performed. In particular, the subgroup analysis was performed by age-group (working-age and older adults),  
201 setting (outpatient, inpatient and mixed) and study period in relation to the COVID-19 pandemic (before and  
202 after the 2020/2021 season). The meta-regression modeling was then conducted to examine the influence of  
203 study characteristics on the RSV-related endpoints. This latter was performed only when  $\geq 10$  estimates were  
204 available [29]. A leave-one-out sensitivity analysis was finally conducted to check the robustness of pooled  
205 estimates.

206 Meta-analysis was performed in R (R Foundation for Statistical Computing; Vienna, Austria) package “Meta”  
207 v. 6.5-0.

208

### 209 **3. Results**

210

#### 211 **3.1. Characteristics of the included studies**

212

213 The automatic search generated 312 records, of which 171 were duplicates. Following screening of 141  
214 records, 37 were judged potentially eligible. Twelve studies were excluded with reasons and are reported in  
215 S3 Table. Manual search identified further 12 studies and therefore the final list was composed of 35 studies  
216 corresponding to 37 publications [30–66]. Notably, results relative to a retrospective cohort (henceforth referred  
217 to as “Boattini 2021–2023”) were presented in three different publications [64–66]. Following correspondence  
218 with the corresponding author, who provided additional data, it was decided to include all these records.  
219 Moreover, relevant data (not reported within the article) were also obtained from other two corresponding  
220 authors [55,59]. The entire study selection process is reported in Fig 1.

221

#### 222 **Fig 1. PRISMA flow diagram of the study selection process.**

223

224 Most (83%; 29/35) studies included were full-length articles, while the remaining six were conference abstracts  
225 [45,47], letters to editor [43,57] and short papers [31,39]. Principal characteristics of the studies are  
226 summarized in Table 1. Briefly, the studies covered a period from the 2001/2002 season to the 2022/2023  
227 season and most (63%; 22/35) were conducted in the north of Italy. Approximately half (49%; 17/35) of the  
228 studies investigated more than one RSV season and the period of nine (26%) studies overlapped with the  
229 COVID-19 pandemic. Design of the majority of studies was judged cross-sectional (54%; 19/35) or surveillance

230 (29%; 10/35) and the median sample size was 328 (range 43–28,500) patients. The study population was  
 231 composed of outpatients, inpatients and mixed groups in 20% (7/35), 37% (13/35) and 31% (11/35) of studies  
 232 respectively; the remaining four (11%) studies were focused on hematological [43–45] and cystic fibrosis [57]  
 233 in-/outpatients. The setting of these latter four studies was therefore categorized as “immunocompromised  
 234 patients”. All but one studies used at least one laboratory assay (mostly RT-PCR) for RSV detection. The  
 235 remaining study [35] analyzed RSV-specific HDRs. Within laboratory-based studies (n = 34), there was a high  
 236 level of heterogeneity in terms of clinical entity triggering the specimen collection, especially in mixed and  
 237 hospital settings. Six out 7 (86%) outpatient studies enrolled ILI patients. ILI and SARI were more frequently  
 238 defined according to the European criteria (S4 Table). Out-of-season samples were frequent (38%; 13/34) and  
 239 most studies analyzed only (56%; 19/34) upper respiratory tract specimens. The majority (74%; 26/35) of  
 240 studies were funded by public institutions.

241

242 **Table 1. Characteristics of the studies included.**

243

| Study [Ref]        | Study period    | Design          | Region (area)    | Age, years <sup>a</sup> | Setting    | Biological sample trigger or testing reason | Sample size <sup>a</sup> | Case ascertainment (specimen type)   | Out-of-season samples | Funding |
|--------------------|-----------------|-----------------|------------------|-------------------------|------------|---------------------------------------------|--------------------------|--------------------------------------|-----------------------|---------|
| Rovida 2005 [30]   | 10/2001–05/2002 | Cross-sectional | Lombardy (North) | ≥16                     | Inpatient  | ARI                                         | 73                       | RT-PCR and monoclonal antibodies (U) | Yes                   | Public  |
| Minosse 2008 [31]  | 04/2004–05/2005 | Surveillance    | Lazio (Center)   | ≥18                     | Inpatient  | Respiratory diseases (ARI, COPD, pneumonia) | 433                      | RT-PCR (L)                           | Yes                   | Public  |
| Puzzelli 2009 [32] | 11/2004–04/2007 | Surveillance    | Lazio (Center),  | ≥14                     | Outpatient | ILI                                         | 356                      | RT-PCR (U)                           | No                    | Public  |

|                            |                     |                           |                      |                  |           |                                                                                                                                                                                         |     |                                  |     |        |
|----------------------------|---------------------|---------------------------|----------------------|------------------|-----------|-----------------------------------------------------------------------------------------------------------------------------------------------------------------------------------------|-----|----------------------------------|-----|--------|
|                            |                     |                           | Campani<br>a (South) |                  |           |                                                                                                                                                                                         |     |                                  |     |        |
| Costa<br>2007 [33]         | 05/2005–<br>10/2005 | Cross-<br>sectional       | Piedmon<br>t (North) | ≥17              | Mixed     | Clinical<br>request                                                                                                                                                                     | 46  | Culture<br>(L)                   | Yes | NA     |
| Gerna<br>2009 [34]         | 11/2006–<br>05/2007 | Cross-<br>sectional       | Lombard<br>y (North) | ≥18              | Mixed     | ARI                                                                                                                                                                                     | 244 | RT-<br>PCR<br>(U/L)              | Yes | Public |
| Cocchio<br>2023 [35]       | 01/2007–<br>12/2021 | Cross-<br>sectional       | Veneto<br>(North)    | ≥50 <sup>b</sup> | Inpatient | –                                                                                                                                                                                       | 250 | RSV-<br>specific<br>HDRs<br>(NA) | –   | Public |
| Gambarin<br>o 2009<br>[36] | Presumab<br>ly 2008 | Cross-<br>sectional       | Piedmon<br>t (North) | ≥16              | Inpatient | Respiratory<br>conditions                                                                                                                                                               | 324 | RT-<br>PCR (L)                   | Yes | Public |
| Paba 2014<br>[37]          | 02/2009–<br>05/2011 | Validation of<br>an assay | Lazio<br>(Center)    | ≥16              | Mixed     | ILI                                                                                                                                                                                     | 178 | RT-<br>PCR<br>(U/L)              | Yes | Public |
| Pierangeli<br>2011 [38]    | 02/2009–<br>03/2010 | Cross-<br>sectional       | Lazio<br>(Center)    | ≥18              | Mixed     | Fever at ED<br>admission<br>or in the<br>preceding 5<br>days and ≥1<br>respiratory<br>diagnosis<br>(ICD-9: 462,<br>466.0, 485,<br>480–486,<br>786.0,<br>786.2,<br>786.5,<br>793.1, 487) | 238 | RT-<br>PCR (U)                   | No  | Public |
| Nisii 2010<br>[39]         | 05/2009–<br>12/2009 | Cross-<br>sectional       | Lazio<br>(Center)    | ≥16              | Mixed     | ILI                                                                                                                                                                                     | 544 | RT-<br>PCR (U)                   | Yes | NA     |
| Tramuto<br>2016 [40]       | 07/2009–<br>12/2012 | Cross-<br>sectional       | Sicily<br>(South)    | ≥15              | Inpatient | SARI with<br>ICU<br>admission                                                                                                                                                           | 192 | RT-<br>PCR<br>(U/L)              | Yes | Public |

|                         |                 |                    |                        |     |                                          |                                                     |                          |                     |     |         |
|-------------------------|-----------------|--------------------|------------------------|-----|------------------------------------------|-----------------------------------------------------|--------------------------|---------------------|-----|---------|
| Piralla 2017 [41]       | 11/2009–04/2016 | Cross-sectional    | Lombardy (North)       | ≥18 | Inpatient                                | CAP with ICU admission                              | 376                      | RT-PCR (U/L)        | No  | Public  |
| Ansaldi 2012 [42]       | 11/2010–04/2011 | Prospective cohort | Liguria (North)        | ≥60 | Outpatient                               | ILI                                                 | 2551 (45 tested for RSV) | RT-PCR (U)          | No  | NA      |
| Bigliardi 2015 [43]     | 2010–2014       | Cross-sectional    | Emilia-Romagna (North) | ≥15 | Immuno-compromised patients <sup>c</sup> | LRTD                                                | 144                      | Probably RT-PCR (L) | Yes | Public  |
| Mikulska 2014 [44]      | 01/2011–03/2011 | Prospective cohort | Liguria (North)        | ≥18 | Immuno-compromised patients <sup>c</sup> | ILI, ARI, any new symptom and screening             | 193                      | RT-PCR (U/L)        | No  | Public  |
| Passi 2019 [45]         | 01/2011–03/2019 | Surveillance       | Lombardy (North)       | ≥18 | Immuno-compromised patients <sup>c</sup> | URTI                                                | 151                      | RT-PCR (U)          | Yes | NA      |
| Pellegrinelli 2020 [46] | 11/2014–04/2018 | Surveillance       | Lombardy (North)       | ≥16 | Outpatient                               | ILI                                                 | 706                      | RT-PCR (U)          | No  | Public  |
| Costa 2023 [47]         | 11/2014–04/2022 | Cross-sectional    | Liguria (North)        | ≥18 | Mixed                                    | Clinical request                                    | 11,658                   | RT-PCR (U/L)        | No  | Public  |
| Tramuto 2021 [48]       | 10/2015–04/2020 | Cross-sectional    | Sicily (South)         | >18 | Mixed                                    | ILI (outpatients), SARI (inpatients)                | 3727                     | RT-PCR (U/L)        | No  | Private |
| Leli 2021 [49]          | 01/2016–06/2020 | Cross-sectional    | Piedmont (North)       | ≥18 | Mixed                                    | Respiratory infection                               | 375                      | RT-PCR (U)          | Yes | Public  |
| Ciotti 2020 [50]        | 10/2016–03/2019 | Cross-sectional    | Lazio (Center)         | ≥18 | Inpatient                                | Suspected or documented respiratory virus infection | 539                      | RT-PCR (U/L)        | Yes | Public  |

|                        |                 |                                  |                                                                            |     |                                          |                                                     |                        |                            |     |                    |
|------------------------|-----------------|----------------------------------|----------------------------------------------------------------------------|-----|------------------------------------------|-----------------------------------------------------|------------------------|----------------------------|-----|--------------------|
| De Francesco 2021 [51] | 01/2017–05/2021 | Cross-sectional                  | Lombardy (North)                                                           | ≥18 | Inpatient                                | SARI                                                | 3974                   | RT-PCR (U/L)               | Yes | Public             |
| Galli 2020 [52]        | 11/2018–04/2019 | Validation of swab self-sampling | Lombardy (North)                                                           | ≥18 | Outpatient                               | ILI                                                 | 262                    | RT-PCR (U)                 | No  | Public             |
| Domnich 2024 [53]      | 11/2018–03/2020 | Surveillance                     | Liguria (North)                                                            | ≥18 | Outpatient                               | ILI                                                 | 1240                   | RT-PCR (U)                 | No  | Public and private |
| Spagnuolo 2021 [54]    | 01/2019–02/2019 | Cross-sectional                  | Lazio (Center)                                                             | >18 | Inpatient                                | CAP with ED admission                               | 75                     | RT-PCR (U)                 | No  | NA                 |
| Sberna 2022 [55]       | 10/2019–12/2021 | Cross-sectional                  | Lazio (Center)                                                             | ≥18 | Inpatient                                | SARI                                                | 557                    | RT-PCR (U)                 | No  | Public             |
| Pierangeli 2022 [56]   | 12/2018–04/2019 | Surveillance                     | Lombardy, South Tyrol (North), Veneto, Marche, Lazio (Center) <sup>d</sup> | ≥16 | Mixed                                    | ILI (Lombardy) or clinical request (other regions)  | Unclear <sup>e</sup>   | RT-PCR (U/L)               | No  | Public             |
| Scagnolari 2020 [57]   | 11/2019–03/2020 | Retrospective cohort             | Lazio (Center)                                                             | >18 | Immuno-compromised patients <sup>f</sup> | Medically attended respiratory disease or screening | 183                    | RT-PCR (U)                 | No  | Public             |
| Galli 2021 [58]        | 11/2019–04/2020 | Surveillance                     | Lombardy (North)                                                           | ≥15 | Outpatient                               | ILI                                                 | 401                    | RT-PCR (U)                 | No  | Public             |
| Treggiari 2022 [59]    | 11/2019–01/2022 | Cross-sectional                  | Veneto (North)                                                             | >18 | Mixed                                    | Clinical request                                    | ca 28,500 <sup>g</sup> | RT-PCR (U)                 | No  | Public             |
| Calderaro 2021 [60]    | 12/2019–03/2020 | Surveillance                     | Emilia-Romagna (North)                                                     | ≥18 | Mixed                                    | Clinical request                                    | 332                    | RT-PCR, IFA, culture (U/L) | No  | Public             |
| Milano 2023 [61]       | 11/2021–04/2022 | Surveillance                     | Tuscany (Center)                                                           | ≥18 | Inpatient                                | SARI                                                | 129                    | RT-PCR (U)                 | No  | Public and private |

|                                       |                     |                         |                     |     |            |                               |      |                |    |         |
|---------------------------------------|---------------------|-------------------------|---------------------|-----|------------|-------------------------------|------|----------------|----|---------|
| Panatto<br>2023 [62]                  | 12/2021–<br>03/2022 | Surveillance            | Liguria<br>(North)  | ≥18 | Outpatient | Any<br>respiratory<br>symptom | 1213 | RT-<br>PCR (U) | No | Private |
| Santus<br>2023 [63]                   | 10/2022–<br>03/2023 | Cross-<br>sectional     | Lombardy<br>(North) | ≥18 | Inpatient  | ILI at ED<br>visit            | 717  | RT-<br>PCR (U) | No | Public  |
| Boattini<br>2021–<br>2023 [64–<br>66] | 10/2017–<br>04/2019 | Retrospective<br>cohort | Piedmont<br>(North) | ≥18 | Inpatient  | LRTD                          | 43   | RT-<br>PCR (U) | No | Public  |

244 <sup>a</sup> In studies that enrolled also children, only adult individuals were considered; <sup>b</sup> Age-group 5–49 years was excluded; <sup>c</sup> All patients had  
245 hematological conditions; <sup>d</sup> The study had also a center in Emilia-Romagna, which enrolled only young children 0–3 years; <sup>e</sup> A total of  
246 11,577 samples were tested for RSV and 423 adults tested positive, the total number of adults tested was not reported; <sup>f</sup> All patients had  
247 cystic fibrosis; <sup>g</sup> Number imputed from the available percentages; ARI, Acute respiratory infection; CAP, community-acquired pneumonia;  
248 COPD, Chronic obstructive pulmonary disease; ED, Emergency department; HDR, Hospital discharge record; ICD, International Statistical  
249 Classification of Diseases and Related Health Problems; ICU, Intensive care unit; IFA, Immunofluorescence assay; ILI, Influenza-like  
250 illness; L, Lower respiratory tract specimens; LRTD, Lower respiratory tract disease; NA, Not available; RT-PCR, Reverse-transcription  
251 polymerase chain reaction; SARI, Severe Acute respiratory infection; U, Upper respiratory tract specimens; U/L, Upper and lower  
252 respiratory tract specimens; URTI, Upper respiratory tract infection.

253

254 Fourteen [32,38,40,41,44,46,48,51,53,58,61–66] out of 29 full-length articles were judged at low risk of bias,  
255 while the remaining 15 studies [30,33–37,42,49,50,52,54–56,59,60,64–66] had at least one possible source  
256 of bias (S5 Table). The most frequent criticalities concerned insufficient description of patients and setting,  
257 inappropriate sample frame and small sample size.

258

### 259 3.2. RSV attack rate

260

261 Three cohort studies [42,44,57] allowed to determine RSV attack rates. The first one [42] consisted of a cohort  
262 of 2551 community-dwelling adults aged ≥60 years who were actively surveilled for ILI between November  
263 2010 and April 2011. A total of 45 ILI cases were prospectively identified and these cases were tested in RT-  
264 PCR. Other 63 ILI cases were identified retrospectively and thus not tested in RT-PCR. Two out of 45 samples  
265 tested positive for RSV, giving a symptomatic attack rate of 0.8 ‰ (95% CI: 0.1–2.8‰). If corrected for under-  
266 testing, the cumulative incidence would rise to 1.9 ‰ [42]. Mikulska et al. [44] followed for three months (from  
267 January to March 2011) 193 hematological outpatients. A total of 21 swabs tested positive for RSV, with an  
268 overall attack rate of 10.9% (95% CI: 6.9–16.2%). Of RSV-positive subjects, 18 (85.7%) were symptomatic,

269 while the remaining three (14.3%) patients were asymptomatic [44]. In a retrospective cohort of adult (>18  
270 years) subjects affected by cystic fibrosis [57] eight out of 183 patients tested positive for RSV between  
271 November 2019 and March 2020, giving an attack rate of 4.4% (95% CI: 1.9–8.4%). Owing to different study  
272 populations, a pooled analysis of these three studies was judged unfeasible.

273

### 274 **3.3. Prevalence of RSV positivity**

275

276 A total of 85 RSV positivity prevalence estimates were extracted from 32 studies, of which 42 (S6 Table), 21  
277 (S7 Table) and 22 (S8 Table) concerned adults of any age, working-age and older adults, respectively. Seven  
278 estimates from three studies [51,55,59] covered exclusively the 2020/2021 season and were excluded from  
279 the pooled analysis.

280 As shown in Fig 2, the positivity rate in adults of any age ranged from 0.2% to 35.7%. The RE pooled estimate  
281 was 4.5% (95% CI: 3.2–5.9%). As expected, the heterogeneity was high ( $I^2 = 93.2\%$ ) and the 95% PI was 0.0–  
282 15.9%. Immunocompromised patients showed the highest RSV positivity prevalence of 11.5%. Compared with  
283 outpatients (4.9%), inpatients had lower prevalence of RSV (2.9%). Studies conducted in both settings showed  
284 an intermediate pooled estimate (3.7%). Omission of single studies did not alter significantly the observed  
285 pooled proportions.

286

287 **Fig 2. Forest plot of the random-effects model on RSV positivity prevalence among Italian adults of**  
288 **any age, by setting.**

289

290 In the subgroup analysis by age-group (Fig 3), working-age adults showed lower (3.5%) RSV prevalence than  
291 older adults (4.4%). RSV detection was more frequent in outpatients than inpatients in both age-specific RE  
292 models. RSV detection was also higher in studies conducted before the COVID-19 pandemic than among  
293 those performed during the pandemic (i.e., seasons 2021/2022 and 2022/2023) (S1 Fig).

294

295 **Fig 3. Forest plot of the random-effects model on RSV positivity prevalence among Italian working-age**  
296 **and older adults, by setting.**

297

298 A meta-regression analysis was conducted to investigate sources of the heterogeneity observed (S9 Table).  
299 Apart from the study setting, geographic area and sample size explained some variance in the reported

300 proportions. In particular, compared with northern regions (5.5%), RSV prevalence was as twice as lower in  
301 central Italy (2.7%) (S2 Fig). Studies that enrolled <300 patients reported significantly higher prevalence (6.3%)  
302 estimates than larger studies (3.0%) (S3 Fig). Publication year, public funding, number of seasons, inclusion  
303 of out-of-season samples, specimen type and risk of bias were not associated with the reported RSV detection  
304 rate (S9 Table).

305 Data on RSV subtypes was reported in nine studies [39,40,44,46–48,53,56,62]. In these studies, both subtypes  
306 co-circulated, although a relative dominance on one subtype over another varied by study period (S10 Table).  
307 On average, from 2009 to 2022 both subtypes were detected in almost equal proportions (RE model estimate  
308 for RSV B: 56.3%; 95% CI: 44.1–68.1%;  $I^2 = 88.4\%$ ) (S4 Fig).

309 Sanger sequencing was performed in three studies [46,56,62] conducted between 2014/2015 and 2021/2022  
310 seasons. During the 2014/15 and 2015/16 seasons, both NA1 and ON1 genotypes of RSV A were circulating  
311 [46]. Conversely, starting from the 2017/2018 season all RSV A strains clustered within the ON1 genotype  
312 [46,56,62]. All RSV B strains belonged to the BA genotypes [46,56,62].

313

#### 314 **3.4. Prevalence of viral co-detections**

315

316 Thirteen studies reported data on viral co-detections [30,31,36,37,40,47,51,53,54,60–63]. However, only five  
317 estimates [37,47,51,53,63] were based on a sufficient ( $\geq 30$ ) number of RSV-positive samples and were  
318 therefore less prone to the small study effect (S11 Table). In these studies, 2.9–18.6% of RSV-positive  
319 specimens tested also positive for other respiratory viruses. In the RE model (S5 Fig), the pooled estimate  
320 was 8.6% (95% CI: 3.2–15.9%) and the heterogeneity was high ( $I^2 = 92.0\%$ ). Influenza A, seasonal  
321 coronaviruses, rhinovirus and parainfluenza viruses were detected more frequently (S11 Table). These results  
322 should be interpreted cautiously, since the multiplex RT-PCR panels used differ from the point of view of  
323 antigens included.

324

#### 325 **3.5. Severe RSV disease**

326

327 The prespecified outcomes ascribable to severe RSV disease were reported in nine studies  
328 [35,41,42,44,50,54,56,63,64–66] (Table 2). Pierangeli et al. [56] reported that 63.1%, 63.3% and 79.3% of  
329 adults (both out- and inpatients) aged 16–65, 65–80 and >80 years had antibiotic prescriptions. The study,  
330 however, did not reported raw data. In an outpatient cohort (n = 2551) of adults aged  $\geq 60$  years [42], none of



331 seven cases of community-acquired pneumonia (CAP) tested positive for RSV. Ciotti et al. [50] reported that  
 332 among 23 hospitalized cases of viral pneumonia, one (4.3%) was due to RSV. In a multi-season (from  
 333 2009/2010 to 2015/2016) study by Piralla et al. [41], the prevalence of RSV among subjects (11/376) with CAP  
 334 admitted to ICU was 2.9%. Among 19 RSV-positive hematological patients [44], two (10.5%) developed LRTD  
 335 and the 30-day mortality was 0% (95% CI: 0–17.6%). Spagnolello et al. [54] reported that among CAP patients  
 336 who referred to emergency departments (n = 75), three tested positive for RSV (4.0%; 95% CI: 1.5–13.1%).  
 337 However, the study period was limited to one month only (from 15 January to 22 February 2019) [54].

338

339 **Table 2. Severe RSV-related outcomes, by study.**

340

| Study                      | Age, years | Outcome                                                                                                                                   | % (n/N)         | 95% CI             |
|----------------------------|------------|-------------------------------------------------------------------------------------------------------------------------------------------|-----------------|--------------------|
| Cocchio 2023 [35]          | 50–69      | % in-hospital mortality                                                                                                                   | 4.9 (4/81)      | 1.4–12.2           |
|                            | ≥70        |                                                                                                                                           | 7.1 (12/169)    | 3.7–12.1           |
| Piralla 2017 [41]          | ≥18        | % RSV detection in patients with CAP admitted to ICU                                                                                      | 2.9 (11/376)    | 1.5–5.2            |
| Ansaldo 2012 [42]          | ≥60        | % RSV detection in patients with CAP                                                                                                      | 0 (0/7)         | 0–41.0             |
| Mikulska 2014 [44]         | ≥18        | % RSV-positive hematological patients who developed LRTD                                                                                  | 10.5 (2/19)     | 1.3–33.1           |
|                            |            | % 30-day mortality                                                                                                                        | 0 (0/19)        | 0–17.6             |
| Ciotti 2020 [50]           | ≥18        | % RSV detection in patients hospitalized for viral pneumonia                                                                              | 4.3 (1/23)      | 0.1–21.9           |
| Spagnolello 2021 [54]      | >18        | % RSV detection in ED patients with CAP                                                                                                   | 4.0 (3/75)      | 1.5–13.1           |
| Pierangeli 2022 [56]       | 16–65      | % antibiotic use in RSV-positive subjects                                                                                                 | 63.1 (NA)       | NA                 |
|                            | 65–80      |                                                                                                                                           | 63.3 (NA)       | NA                 |
|                            | >80        |                                                                                                                                           | 79.3 (NA)       | NA                 |
| Santus 2023 [63]           | ≥18        | % antibiotic use in RSV-positive inpatients                                                                                               | 78.7 (48/61)    | 66.3–88.1          |
|                            |            | Median length of hospital stay, days                                                                                                      | 13 <sup>a</sup> | 7–22 <sup>b</sup>  |
|                            |            | % RSV-positive inpatients with acute respiratory failure, need for respiratory support, shock, sepsis, ICU admission or in-hospital death | 70.5 (43/61)    | 57.4–81.5          |
|                            |            | % RSV-positive inpatients with ICU admission                                                                                              | 6.6 (4/61)      | 1.8–15.9           |
|                            |            | % in-hospital mortality                                                                                                                   | 6.6 (4/61)      | 1.8–15.9           |
| Boattini 2021–2023 [64–66] | ≥18        | % pneumonia in hospitalized RSV-positive subjects                                                                                         | 58.1 (25/43)    | 42.1–73.0          |
|                            | ≥18        | Median length of hospital stay, days                                                                                                      | 19 <sup>a</sup> | 11–30 <sup>b</sup> |
|                            | ≥65        |                                                                                                                                           | 23 <sup>a</sup> | 8–34 <sup>b</sup>  |
|                            | ≥18        | % invasive and non-invasive mechanical ventilation in hospitalized RSV-positive subjects                                                  | 30.2 (13/43)    | 17.2–46.1          |
|                            | ≥65        |                                                                                                                                           | 27.3 (3/11)     | 6.0–61.0           |
|                            | ≥18        | % in-hospital mortality                                                                                                                   | 16.3 (7/43)     | 6.8–30.7           |

|  |     |  |            |          |
|--|-----|--|------------|----------|
|  | ≥65 |  | 9.1 (1/11) | 0.2–41.3 |
|--|-----|--|------------|----------|

341 <sup>a</sup>Median; <sup>b</sup>Interquartile range; CAP, community-acquired pneumonia; CI, Confidence interval; ED, Emergency department; ICU, Intensive  
342 care unit; LRTD, Lower respiratory tract disease; NA, Not available.

343

344 In a hospitalized cohort of RSV-positive adults (n = 61) [63], severe RSV disease (defined as presence of at  
345 least one of the following: acute respiratory failure, need for respiratory support, shock, sepsis, ICU admission  
346 or in-hospital death) was observed in 70.5% of patients. Antibiotics, systemic steroids, inhaled steroids,  
347 oseltamivir and other antivirals were administered to 79.0%, 65.6%, 70.0%, 13.1% and 8.2% of patients  
348 respectively. The median length of stay was 13 (IQR: 7–22) days. ICU admission and in-hospital mortality  
349 rates were both 6.6%.

350 In a retrospective cohort study by Boattini et al. [64–66], 58.1% (n = 43) of RSV-positive hospitalized adults  
351 ≥18 years had radiologically-confirmed pneumonia. The median length of stay for the entire cohort was 19  
352 (IQR: 11–30) days, while it increased up to 23 (IQR: 8–34) days for adults aged ≥65 years. A total of 30.2% of  
353 subjects needed invasive and non-invasive mechanical ventilation, while the in-hospital mortality was 16.3%.  
354 Cocchio et al. [35] analyzed HDRs for RSV-specific ICD-9 codes in Veneto for 15 consecutive years (2007–  
355 2021). Of the total of 6961 (5818, 741 and 402 for acute bronchiolitis due to RSV, pneumonia due to RSV and  
356 RSV, respectively) hospitalizations, 81 (1.2%; 8, 41 and 32 for acute bronchiolitis due to RSV, pneumonia due  
357 to RSV and RSV, respectively) and 169 (2.4%; 31, 74 and 64 for acute bronchiolitis due to RSV, pneumonia  
358 due to RSV and RSV, respectively) encounters occurred in adults aged 50–69 and ≥70 years, respectively.  
359 The length of stay increased linearly with the increasing age for acute bronchiolitis due to RSV ( $\beta = 0.080$ ;  
360 95% CI: 0.059–0.100;  $P < 0.001$ ), pneumonia due to RSV ( $\beta = 0.109$ ; 95% CI: 0.083–0.135;  $P < 0.001$ ) and  
361 RSV ( $\beta = 0.063$ ; 95% CI: 0.045–0.081;  $P < 0.001$ ), respectively. Of 23 deaths identified, 73.9% (17/23) were  
362 registered in subjects aged ≥50 years. The overall in-hospital mortality rate was 4.9% (4/81; 0%, 7.3% and  
363 3.1% for acute bronchiolitis due to RSV, pneumonia due to RSV and RSV, respectively) and 7.1% (12/169;  
364 12.9%, 10.8% and 0% for acute bronchiolitis due to RSV, pneumonia due to RSV and RSV, respectively) in  
365 subjects aged 50–69 and ≥70 years, respectively.

366 As reported in Table 2, only the outcome of in-hospital mortality was reported in more studies [35,63–66]. In a  
367 pooled analysis of four estimates (S7 Fig), the in-hospital mortality was 7.2% (95% CI: 4.7–10.3%). The  
368 heterogeneity was relatively low ( $I^2 = 30.6\%$ ) and the 95% PI was 2.2–14.5%.

369

## 370 4. Discussion

371

372 This SRMA showed that RSV is a frequent respiratory pathogen that poses a measurable burden to Italian  
373 adults. However, this BoD is unevenly distributed within the Italian adult population, being higher in older age  
374 groups and subjects with underlying health conditions. Our findings may inform principal stakeholders and  
375 support policy makers on the introduction of the recently authorized adults RSV vaccines [13] with the aim to  
376 ensure effective and coherent resource allocation. Analogously, our study is a good starting point for the  
377 upcoming cost-effectiveness and budget impact models. We finally identified principal data gaps, which must  
378 be addressed by future research.

379 Our meta-analysis showed that 4.5% of respiratory samples tests positive for RSV and the 95% PI suggested  
380 that the next estimate would be between 0% and 16%. This uncertainty reflects both natural between-season  
381 variation in the circulation of RSV and characteristics of the population surveilled. We indeed showed that  
382 compared with hospitalized individuals, community-dwelling adults had higher positivity prevalence (4.9% vs  
383 2.9%). At the same time, compared with working-age adults (3.5%), RSV prevalence was higher in older adults  
384 (4.4%) and individuals with immunosuppressive disorders (11.5%). It should be stressed that all these pooled  
385 estimates are probably conservative, as a certain level of underestimation is likely for several reasons. First,  
386 most primary care studies were conducted within the existing influenza surveillance framework that usually  
387 relied on ILI-based case definitions. Different studies [53,67,68] have proved that a significant proportion of  
388 RSV-positive adults have no fever and therefore ILI and fever-based case definitions intrinsically  
389 underestimate the true incidence of RSV. Second, several hospital-based studies considered only one type of  
390 specimen. It has been, for example, shown [69] that adding RT-PCR of sputum to that of nasal or  
391 nasopharyngeal swab specimens increases RSV detection by 39–100%. Indeed, RSV may migrate from the  
392 upper to lower respiratory tracts and thus RT-PCR performed on naso/oropharyngeal swabs would produce a  
393 false-negative result [28].

394 When comparing our results to those of the global-level SRMAs [5–8], we noted both similarities and  
395 differences. Nguyen-Van-Tam et al. [7] have reported that the cumulative attack rate of RSV in older adults  
396 ranged from 0.27‰ to 108‰. This 400-fold difference [7] is unlikely to be explained by the epidemiology of  
397 RSV alone, but is rather linked to the design of single studies. As for RSV incidence in industrialized countries,  
398 Shi et al. obtained pooled estimates of 6.7‰ (95% CI: 1.4–31.5‰) [5] and 30.3‰ (95% CI: 5.3–59.9‰) [8] for  
399 older and high-risk adults, respectively. In Italy, the available incidence estimates were 1.9 ‰ [42] and 4.4–  
400 10.9% [44,57] for older adults and adults with immunosuppressive conditions, respectively. Italian data,  
401 however, came from single-season studies and thus affected by RSV circulation patterns in those particular

402 seasons. RSV positivity prevalence appears instead more consistent. For instance, a meta-analysis of  
403 European studies by Tin Tin Htar et al. [6] reported that 7% (95% CI: 4–11%), 9% (95% CI: 4–17%) and 10%  
404 (95% CI: 5–16%) of ILI/ARI cases in all adults, subjects aged <50 and ≥50 years, respectively, tested positive  
405 for RSV. Shi et al. [5] estimated that RSV positivity among hospitalized older adults with ARI was 4.4% (95%  
406 CI: 3.0–6.5%). Our meta-analytical proportions were in line with these figures. For what concerns mortality  
407 indicators, the pooled in-hospital mortality in Italy was 7.2%. In comparison, the case-fatality proportions  
408 ranged from 1.6% (95% CI: 0.7–3.8%) [5] to 8.2% (95% CI 5.5–11.9%) [7] in the available global-level SRMAs.  
409 Apart from age, underlying immunosuppressive conditions and setting, RSV positivity prevalence was  
410 associated with the study location and sample size. Studies conducted in the north of Italy reported on average  
411 a higher frequency of RSV. Compared with central and southern regions, mean winter temperature in northern  
412 regions is lower [70]. Lower ambient temperature is a well-known positive predictor of RSV detection frequency  
413 [71–73]. Smaller studies tended to report a higher RSV prevalence, which is consistent with the small study  
414 effect. Fortunately, the double arcsine transformation prevents the undue large weights for these studies [74].  
415 Future epidemiological studies should *a priori* determine an adequate number of subjects to be tested for RSV.  
416 Despite a relatively high number of publications identified, most studies were limited to quantifying prevalence  
417 of RSV following clinical request or in the context of influenza surveillance and were not specifically designed  
418 to investigate RSV epidemiology and the associated BoD. Only a few papers went beyond mere positivity  
419 prevalence reports. Currently, no cohort studies have evaluated the natural history of RSV disease in Italian  
420 adults. In particular, it remains unclear how many RSV-positive adult outpatients develop complications and  
421 being hospitalized. Some of these data gaps could be filled by a retrospective analysis of HDRs, but only if  
422 matched with laboratory data. Indeed, many RSV-positive patients could be attributed alternative diagnostic  
423 codes. Despite being highly specific and useful for the analysis of case-fatality rates, resource use and  
424 temporal trends, studies of RSV-specific HDRs in adults inevitably lead to the underestimation of RSV BoD.  
425 Cai et al. [24] have documented that the RSV-specific ICD-10 codes had a very low sensitivity of 6%.  
426 Retrospective cohort studies based on HDRs only (i.e., without matching with laboratory data) would identify  
427 an implausibly low number of RSV-specific diagnostic codes [35,75]. Another important data gap concerns  
428 RSV epidemiology and BoD in residents of long-term care facilities, who may be the primary target population  
429 for vaccination.

430 As we discussed earlier, the main limitations of the current evidence, which may underestimate RSV BoD,  
431 include the predominant use of influenza-specific case definitions, reliance on a single specimen type, lack of  
432 studies on the natural history of an RSV episode and some important BoD indicators like hospitalization rate.

433 At review level, we must acknowledge that some potentially relevant studies were not identified because their  
434 primary goal was not related to RSV and thus were indexed alternatively.

435 The approval of the new vaccines depends on national authorities. This decision occurs within the framework  
436 of developing national immunization programs and necessitates the utilization of assessment tools, such as  
437 the health technology assessment (HTA) [76]. This process relies on a comprehensive understanding of the  
438 epidemiology, BoD and pertinent economic analyses. Furthermore, HTA organizations are also evaluating the  
439 implementation of guidelines that take into account, in the assessment of new technologies, also their societal  
440 value [77]. This objective aligns with the "Broader value of vaccines" framework proposed by Bell et al. [78].  
441 The framework encompasses various vaccine effects, including strictly health-related impacts, focusing on the  
442 health of vaccinated individuals; general health effects, considering the influence of vaccination on the health  
443 of the unvaccinated population; economic effects on the healthcare system, involving the costs and  
444 corresponding budgetary compensations; and societal economic effects, evaluating broader economic of  
445 vaccines impacts such as effects on productivity and macroeconomic growth from a societal perspective.

446 Incorporating these diverse effects is crucial in the HTA processes [77]. Enhancing the vaccines HTA involves  
447 considering several additional factors, including broader cost offsets within the healthcare system, the  
448 influence of vaccination on the quality of life of caregivers, its effectiveness in reducing viral transmission,  
449 prevention of antimicrobial resistance, and the macroeconomic impacts of vaccination [79]. Moreover, there is  
450 a requirement for novel economic models capable of capturing not only the simple cost/benefit ratio of  
451 vaccination but also its broader value [80].

452 As part of future research and in light of the availability of new vaccines, it is evident that the generation of new  
453 tools, evidence, and data is imperative to delve deeper into the long-term benefits arising from vaccination,  
454 explore macroeconomic implications, understand community impact, and address issues pertaining to equity,  
455 accessibility, and appropriate utilization. Moreover, it is crucial to emphasize greater involvement of citizens in  
456 the implementation of vaccination decisions [81].

457 In conclusion, this article provides a comprehensive assessment of the RSV epidemiology and its BoD in the  
458 Italian adult population. A systematic assessment of the full value of a new vaccination necessitates access to  
459 national data regarding the epidemiological burden of the disease and the presence of effective surveillance  
460 systems. Data plays a pivotal role in generating knowledge and evidence about diseases. Only through  
461 evidence can priority actions for the control of infectious diseases be discerned, facilitating the promotion of  
462 an informed decision-making process. This, in turn, supports the implementation of value-based immunization  
463 strategies. In this paper, we comprehensively assessed RSV epidemiology and BoD in the Italian adult

464 population. Within its shortcomings, this SRMA supports the need to prioritize evaluation of the novel RSV  
465 vaccines by Italian decision makers, especially for older adults and those affected by immunosuppressive  
466 conditions.

467

## 468 **Data availability statement**

469

470 All raw data are within the manuscript and associated supporting materials. Further details may be obtained  
471 from the corresponding author.

472

## 473 **Funding**

474

475 This research received no funding.

476

## 477 **Competing interests**

478

479 AD and GEC declare no conflicts of interest related to this work.

480

## 481 **References**

482

- 483 1. McLaughlin JM, Khan F, Begier E, Swerdlow DL, Jodar L, Falsey AR. Rates of medically attended  
484 RSV among US adults: A systematic review and meta-analysis. *Open Forum Infect Dis.*  
485 2022;9(7):ofac300. doi: 10.1093/ofid/ofac300.
- 486 2. Rafferty E, Paulden M, Buchan SA, Robinson JL, Bettinger JA, Kumar M, et al. Evaluating the  
487 individual healthcare costs and burden of disease associated with RSV across age groups.  
488 *Pharmacoeconomics.* 2022;40(6):633–645. doi: 10.1007/s40273-022-01142-w.
- 489 3. Osei-Yeboah R, Spreuwenberg P, Del Riccio M, Fischer TK, Egeskov-Cavling AM, Bøås H, et al.  
490 Estimation of the number of RSV-associated hospitalisations in adults in the European Union. *J Infect*  
491 *Dis.* 2023;228(11):1539–1548. doi: 10.1093/infdis/jjad189.

- 492 4. Du Y, Yan R, Wu X, Zhang X, Chen C, Jiang D, et al. Global burden and trends of respiratory syncytial  
493 virus infection across different age groups from 1990 to 2019: A systematic analysis of the Global  
494 Burden of Disease 2019 Study. *Int J Infect Dis.* 2023;135:70–76. doi: 10.1016/j.ijid.2023.08.008.
- 495 5. Shi T, Denouel A, Tietjen AK, Campbell I, Moran E, Li X, et al. Global disease burden estimates of  
496 respiratory syncytial virus-associated acute respiratory infection in older adults in 2015: A systematic  
497 review and meta-analysis. *J Infect Dis.* 2020;222(Suppl 7):S577–S583. doi: 10.1093/infdis/jiz059.
- 498 6. Tin Tin Htar M, Yerramalla MS, Moïsi JC, Swerdlow DL. The burden of respiratory syncytial virus in  
499 adults: a systematic review and meta-analysis. *Epidemiol Infect.* 2020;148:e48. doi:  
500 10.1017/S0950268820000400.
- 501 7. Nguyen-Van-Tam JS, O'Leary M, Martin ET, Heijnen E, Callendret B, Fleischhackl R, et al. Burden of  
502 respiratory syncytial virus infection in older and high-risk adults: a systematic review and meta-analysis  
503 of the evidence from developed countries. *Eur Respir Rev.* 2022;31(166):220105. doi:  
504 10.1183/16000617.0105-2022.
- 505 8. Shi T, Vennard S, Jasiewicz F, Brogden R, Nair H; RESCEU Investigators. Disease burden estimates  
506 of respiratory syncytial virus related acute respiratory infections in adults with comorbidity: A  
507 systematic review and meta-analysis. *J Infect Dis.* 2022;226(Suppl 1):S17–S21. doi:  
508 10.1093/infdis/jiab040.
- 509 9. Maggi S, Veronese N, Burgio M, Cammarata G, Ciuppa ME, Ciriminna S, et al. Rate of hospitalizations  
510 and mortality of respiratory syncytial virus infection compared to influenza in older people: A systematic  
511 review and meta-analysis. *Vaccines (Basel).* 2022;10(12):2092. doi: 10.3390/vaccines10122092.
- 512 10. Li Y, Kulkarni D, Begier E, Wahi-Singh P, Wahi-Singh B, Gessner B, et al. Adjusting for case under-  
513 ascertainment in estimating RSV hospitalisation burden of older adults in high-income countries: A  
514 systematic review and modelling study. *Infect Dis Ther.* 2023;12(4):1137-1149. doi: 10.1007/s40121-  
515 023-00792-3.
- 516 11. Haynes AK, Manangan AP, Iwane MK, Sturm-Ramirez K, Homaira N, Brooks WA, et al. Respiratory  
517 syncytial virus circulation in seven countries with Global Disease Detection Regional Centers. *J Infect*  
518 *Dis.* 2013;208(Suppl 3):S246–S254. doi: 10.1093/infdis/jit515.
- 519 12. Staadegaard L, Caini S, Wangchuk S, Thapa B, de Almeida WAF, de Carvalho FC, et al. The global  
520 epidemiology of RSV in community and hospitalized care: Findings from 15 countries. *Open Forum*  
521 *Infect Dis.* 2021;8(7):ofab159. doi: 10.1093/ofid/ofab159.



- 522 13. Kotton CN. More protection against respiratory viral infection: Respiratory syncytial virus vaccines for  
523 adults aged 60 years and older. *Ann Intern Med.* 2023;176(10):1419–1421. doi: 10.7326/M23-2196.
- 524 14. Centers for Disease Control and Prevention (CDC). Healthcare providers: RSV vaccination for adults  
525 60 years of age and over. Available at: [https://www.cdc.gov/vaccines/vpd/rsv/hcp/older-](https://www.cdc.gov/vaccines/vpd/rsv/hcp/older-adults.html#:~:text=CDC%20recommends%20that%20adults%2060,RSV%20vaccination%20will%20be%20beneficial)  
526 [adults.html#:~:text=CDC%20recommends%20that%20adults%2060,RSV%20vaccination%20will%20](https://www.cdc.gov/vaccines/vpd/rsv/hcp/older-adults.html#:~:text=CDC%20recommends%20that%20adults%2060,RSV%20vaccination%20will%20be%20beneficial)  
527 [0be%20beneficial](https://www.cdc.gov/vaccines/vpd/rsv/hcp/older-adults.html#:~:text=CDC%20recommends%20that%20adults%2060,RSV%20vaccination%20will%20be%20beneficial).
- 528 15. United Kingdom Department of Health & Social Care. Respiratory syncytial virus (RSV) immunisation  
529 programme for infants and older adults: JCVI full statement, 11 September 2023. Available at:  
530 [https://www.gov.uk/government/publications/rsv-immunisation-programme-jcvi-advice-7-june-](https://www.gov.uk/government/publications/rsv-immunisation-programme-jcvi-advice-7-june-2023/respiratory-syncytial-virus-rsv-immunisation-programme-for-infants-and-older-adults-jcvi-full-statement-11-september-2023)  
531 [2023/respiratory-syncytial-virus-rsv-immunisation-programme-for-infants-and-older-adults-jcvi-full-](https://www.gov.uk/government/publications/rsv-immunisation-programme-jcvi-advice-7-june-2023/respiratory-syncytial-virus-rsv-immunisation-programme-for-infants-and-older-adults-jcvi-full-statement-11-september-2023)  
532 [statement-11-september-2023](https://www.gov.uk/government/publications/rsv-immunisation-programme-jcvi-advice-7-june-2023/respiratory-syncytial-virus-rsv-immunisation-programme-for-infants-and-older-adults-jcvi-full-statement-11-september-2023).
- 533 16. Levine MM, Levine OS. Influence of disease burden, public perception, and other factors on new  
534 vaccine development, implementation, and continued use. *Lancet.* 1997;350(9088):1386–1392. doi:  
535 10.1016/S0140-6736(97)03253-4.
- 536 17. Munn Z, Stern C, Aromataris E, Lockwood C, Jordan Z. What kind of systematic review should I  
537 conduct? A proposed typology and guidance for systematic reviewers in the medical and health  
538 sciences. *BMC Med Res Methodol.* 2018;18(1):5. doi: 10.1186/s12874-017-0468-4.
- 539 18. Barker TH, Migliavaca CB, Stein C, Colpani V, Falavigna M, Aromataris E, et al. Conducting  
540 proportional meta-analysis in different types of systematic reviews: A guide for synthesisers of  
541 evidence. *BMC Med Res Methodol.* 2021;21(1):189. doi: 10.1186/s12874-021-01381-z.
- 542 19. Boccalini S, Bonito B, Salvati C, Del Riccio M, Stancanelli E, Bruschi M, et al. Human respiratory  
543 syncytial virus epidemiological burden in pediatric outpatients in Italy: A systematic review. *Vaccines*  
544 (Basel). 2023;11(9):1484. doi: 10.3390/vaccines11091484.
- 545 20. Page MJ, McKenzie JE, Bossuyt PM, Boutron I, Hoffmann TC, Mulrow CD, et al. The PRISMA 2020  
546 statement: an updated guideline for reporting systematic reviews. *BMJ.* 2021;372:n71. doi:  
547 10.1136/bmj.n71.
- 548 21. Munn Z, Moola S, Lisy K, Riitano D, Tufanaru C. Methodological guidance for systematic reviews of  
549 observational epidemiological studies reporting prevalence and cumulative incidence data. *Int J Evid*  
550 *Based Healthc.* 2015;13(3):147-53. doi: 10.1097/XEB.0000000000000054.



- 551 22. Domnich A, Calabrò GE. Burden of RSV in Italian adults: Protocol for a systematic review and meta-  
552 analysis. Available at: [https://www.protocols.io/view/burden-of-rsv-in-italian-adults-protocol-for-a-sys-  
553 5qpvo32odv4o/v1](https://www.protocols.io/view/burden-of-rsv-in-italian-adults-protocol-for-a-sys-5qpvo32odv4o/v1).
- 554 23. Pisesky A, Benchimol EI, Wong CA, Hui C, Crowe M, Belair MA, et al. Incidence of hospitalization for  
555 respiratory syncytial virus infection amongst children in Ontario, Canada: A population-based study  
556 using validated health administrative data. *PLoS One*. 2016;11(3):e0150416. doi:  
557 10.1371/journal.pone.0150416.
- 558 24. Cai W, Tolksdorf K, Hirve S, Schuler E, Zhang W, Haas W, et al. Evaluation of using ICD-10 code data  
559 for respiratory syncytial virus surveillance. *Influenza Other Respir Viruses*. 2020;14(6):630–637. doi:  
560 10.1111/irv.12665.
- 561 25. Haddaway NR, Collins AM, Coughlin D, Kirk S. The role of Google Scholar in evidence reviews and  
562 its applicability to grey literature searching. *PLoS One*. 2015;10(9):e0138237. doi:  
563 10.1371/journal.pone.0138237.
- 564 26. Hamid S, Winn A, Parikh R, Jones JM, McMorrow M, Prill MM, et al. Seasonality of respiratory syncytial  
565 virus - United States, 2017-2023. *MMWR Morb Mortal Wkly Rep*. 2023;72(14):355–361. doi:  
566 10.15585/mmwr.mm7214a1.
- 567 27. Bergeri I, Whelan MG, Ware H, Subissi L, Nardone A, Lewis HC, et al. Global SARS-CoV-2  
568 seroprevalence from January 2020 to April 2022: A systematic review and meta-analysis of  
569 standardized population-based studies. *PLoS Med*. 2022;19(11):e1004107. doi:  
570 10.1371/journal.pmed.1004107.
- 571 28. Rozenbaum MH, Begier E, Kurosky SK, Whelan J, Bem D, Pouwels KB, et al. Incidence of respiratory  
572 syncytial virus infection in older adults: Limitations of current data. *Infect Dis Ther*. 2023;12(6):1487–  
573 1504. doi: 10.1007/s40121-023-00802-4.
- 574 29. The Cochrane Collaboration. Cochrane handbook for systematic reviews of interventions, version  
575 5.1.0, updated March 2011. Meta-regression. Available at: [https://handbook-5-  
576 1.cochrane.org/chapter\\_9/9\\_6\\_4\\_meta\\_regression.htm#:~:text=Meta%2Dregression%20should%20  
577 generally%20not,one%20or%20more%20explanatory%20variables](https://handbook-5-1.cochrane.org/chapter_9/9_6_4_meta_regression.htm#:~:text=Meta%2Dregression%20should%20generally%20not,one%20or%20more%20explanatory%20variables).
- 578 30. Rovida F, Percivalle E, Zavattoni M, Torsellini M, Sarasini A, Campanini G, et al. Monoclonal  
579 antibodies versus reverse transcription-PCR for detection of respiratory viruses in a patient population  
580 with respiratory tract infections admitted to hospital. *J Med Virol*. 2005;75(2):336–347. doi:  
581 10.1002/jmv.20276.

- 582 31. Minosse C, Selleri M, Zaniratti MS, Cappiello G, Longo R, Schifano E, et al. Frequency of detection of  
583 respiratory viruses in the lower respiratory tract of hospitalized adults. *J Clin Virol.* 2008;42(2):215–  
584 220. doi: 10.1016/j.jcv.2008.01.012.
- 585 32. Puzelli S, Valdarchi C, Ciotti M, Dorrucchi M, Farchi F, Babakir-Mina M, et al. Viral causes of influenza-  
586 like illness: Insight from a study during the winters 2004-2007. *J Med Virol.* 2009;81(12):2066-71. doi:  
587 10.1002/jmv.21610.
- 588 33. Costa C, Libertucci D, Solidoro P, Sinesi F, Bergallo M, Margio S, et al. Rapid shell vial culture for the  
589 detection of respiratory viruses from bronchoalveolar lavage in immunocompromised patients.  
590 *Panminerva Med.* 2007;49(1):1–6.
- 591 34. Gerna G, Piralla A, Rovida F, Rognoni V, Marchi A, Locatelli F, et al. Correlation of rhinovirus load in  
592 the respiratory tract and clinical symptoms in hospitalized immunocompetent and  
593 immunocompromised patients. *J Med Virol.* 2009;81(8):1498–1507.
- 594 35. Cocchio S, Prandi GM, Furlan P, Venturato G, Saia M, Marcon T, et al. Respiratory syncytial virus in  
595 Veneto Region: Analysis of hospital discharge records from 2007 to 2021. *Int J Environ Res Public*  
596 *Health.* 2023;20(5):4565. doi: 10.3390/ijerph20054565.
- 597 36. Gambarino S, Mantovani S, Astegiano S, Libertucci D, Solidoro P, Baldi S, et al. Lower respiratory  
598 tract viral infections in hospitalized adult patients. *Minerva Med.* 2009;100(5):349–355.
- 599 37. Paba P, Farchi F, Mortati E, Ciccozzi M, Piperno M, Perno CF, et al. Screening of respiratory  
600 pathogens by Respiratory Multi Well System (MWS) r-gene™ assay in hospitalized patients. *New*  
601 *Microbiol.* 2014;37(2):231–236.
- 602 38. Pierangeli A, Scagnolari C, Selvaggi C, Verzaro S, Spina MT, Bresciani E, et al. Rhinovirus frequently  
603 detected in elderly adults attending an emergency department. *J Med Virol.* 2011;83(11):2043–2047.  
604 doi: 10.1002/jmv.22205.
- 605 39. Nisii C, Meschi S, Selleri M, Bordi L, Castilletti C, Valli MB, et al. Frequency of detection of upper  
606 respiratory tract viruses in patients tested for pandemic H1N1/09 viral infection. *J Clin Microbiol.*  
607 2010;48(9):3383–3385. doi: 10.1128/JCM.01179-10.
- 608 40. Tramuto F, Maida CM, Napoli G, Mammaia C, Casuccio A, Cala' C, et al. Burden and viral aetiology  
609 of influenza-like illness and acute respiratory infection in intensive care units. *Microbes Infect.*  
610 2016;18(4):270–276. doi: 10.1016/j.micinf.2015.11.008.

- 611 41. Piralla A, Mariani B, Rovida F, Baldanti F. Frequency of respiratory viruses among patients admitted  
612 to 26 Intensive Care Units in seven consecutive winter-spring seasons (2009-2016) in Northern Italy.  
613 J Clin Virol. 2017;92:48–51. doi: 10.1016/j.jcv.2017.05.004.
- 614 42. Ansaldo F, De Florentiis D, Parodi V, Rappazzo E, Coppelli M, Martini M, et al. Bacterial carriage and  
615 respiratory tract infections in subjects > or = 60 years during an influenza season: implications for the  
616 epidemiology of community acquired pneumonia and influenza vaccine effectiveness. J Prev Med Hyg.  
617 2012;53(2):94–97.
- 618 43. Bigliardi S, Morselli M, Potenza L, Riva G, Coluccio V, Maccaferri M, et al. Epidemiology and clinical  
619 outcome of lower respiratory tract infections by respiratory syncytial virus or parainfluenza virus type  
620 3 in adults receiving treatment for either acute leukemia or severe aplastic anemia: A retrospective  
621 single center study. Ann Hematol. 2015;94(11):1931–1934. [https://doi.org/10.1007/s00277-015-2455-](https://doi.org/10.1007/s00277-015-2455-3)  
622 3.
- 623 44. Mikulska M, Del Bono V, Gandolfo N, Dini S, Dominietto A, Di Grazia C, et al. Epidemiology of viral  
624 respiratory tract infections in an outpatient haematology facility. Ann Hematol. 2014;93(4):669–676.  
625 doi: 10.1007/s00277-013-1912-0.
- 626 45. Passi A, Pagani C, Gramegna D, Daffini R, Pollara CP, Signorini L, et al. Respiratory viruses are a  
627 significant clinical problem in haematological patients with underestimated adverse outcome: A single  
628 institution 9-years experience. Haematologica 2019;104(S2):29–30.
- 629 46. Pellegrinelli L, Galli C, Bubba L, Cereda D, Anselmi G, Binda S, et al. Respiratory syncytial virus in  
630 influenza-like illness cases: Epidemiology and molecular analyses of four consecutive winter seasons  
631 (2014-2015/2017-2018) in Lombardy (Northern Italy). J Med Virol. 2020;92(12):2999–3006. doi:  
632 10.1002/jmv.25917.
- 633 47. Costa E, Giberti I, Scarpaleggia M, Massolo L, Massaro E, Trombetta CS, et al. Retrospective analysis  
634 of viral diagnostics data of patients referred to the Policlinico San Martino Hospital in Genoa with acute  
635 respiratory infection during eight sequential seasons (2014–2022). Presented at the 33rd European  
636 Congress of Clinical Microbiology and Infectious Diseases (ECCMID), Copenhagen (Denmark), 15–  
637 18 April 2023.
- 638 48. Tramuto F, Maida CM, Di Naro D, Randazzo G, Vitale F, Restivo V, et al. Respiratory syncytial virus:  
639 New challenges for molecular epidemiology surveillance and vaccination strategy in patients with  
640 ILI/SARI. Vaccines (Basel). 2021;9(11):1334. doi: 10.3390/vaccines9111334.

- 641 49. Leli C, Di Matteo L, Gotta F, Vay D, Piceghello A, Cornaglia E, et al. Prevalence of respiratory viruses  
642 by Multiplex PCR: a four-and-a-half year retrospective study in an Italian general hospital. *Infez Med.*  
643 2021;29(1):94–101.
- 644 50. Ciotti M, Maurici M, Santoro V, Coppola L, Sarmati L, De Carolis G, et al. Viruses of respiratory tract:  
645 an observational retrospective study on hospitalized patients in Rome, Italy. *Microorganisms.*  
646 2020;8(4):501. doi: 10.3390/microorganisms8040501.
- 647 51. De Francesco MA, Pollara C, Gargiulo F, Giacomelli M, Caruso A. Circulation of respiratory viruses in  
648 hospitalized adults before and during the COVID-19 pandemic in Brescia, Italy: A retrospective study.  
649 *Int J Environ Res Public Health.* 2021;18(18):9525. doi: 10.3390/ijerph18189525.
- 650 52. Galli C, Pellegrinelli L, Del Castillo G, Forni G, Gandolfi CE, Mosillo M, et al. Self-sampling of  
651 oropharyngeal swabs among healthcare workers for molecular detection of respiratory viruses: A  
652 valuable approach for epidemiological studies and surveillance programs. *Front Public Health.*  
653 2020;8:511669. doi: 10.3389/fpubh.2020.511669.
- 654 53. Domnich A, Orsi A, Ogliastro M, Ferrari A, Bruzzone B, Panatto D, Icardi G. Influenza-like illness  
655 surveillance may underestimate the incidence of respiratory syncytial virus in adult outpatients. *Int J*  
656 *Infect Dis.* Forthcoming.
- 657 54. Spagnolello O, Pierangeli A, Cedrone MC, Di Biagio V, Gentile M, Leonardi A, et al. Viral community  
658 acquired pneumonia at the emergency department: Report from the pre COVID-19 age. *J Med Virol.*  
659 2021;93(7):4399–4404. doi: 10.1002/jmv.26980.
- 660 55. Sberna G, Lalle E, Valli MB, Bordi L, Garbuglia AR, Amendola A. Changes in the Circulation of  
661 Common Respiratory Pathogens among Hospitalized Patients with Influenza-like Illnesses in the Lazio  
662 Region (Italy) during Fall Season of the Past Three Years. *Int J Environ Res Public Health.*  
663 2022;19(10):5962. doi: 10.3390/ijerph19105962.
- 664 56. Pierangeli A, Piralla A, Uceda Renteria S, Giacomel G, Lunghi G, Pagani E, et al. Multicenter  
665 epidemiological investigation and genetic characterization of respiratory syncytial virus and  
666 metapneumovirus infections in the pre-pandemic 2018-2019 season in northern and central Italy. *Clin*  
667 *Exp Med.* 2023;23(6):2725–2737. doi: 10.1007/s10238-022-00973-3.
- 668 57. Scagnolari C, Bitossi C, Frasca F, Viscido A, Oliveto G, Scordio M, et al. No detection of SARS-CoV-  
669 2 in cystic fibrosis patients at the Regional (Lazio) Reference Center for CF in Italy. *J Cyst Fibros.*  
670 2020;19(5):837–838. doi: 10.1016/j.jcf.2020.06.018.

- 671 58. Galli C, Pellegrinelli L, Bubba L, Primache V, Anselmi G, Delbue S, et al. When the COVID-19  
672 pandemic surges during influenza season: Lessons learnt from the sentinel laboratory-based  
673 surveillance of influenza-like illness in Lombardy during the 2019-2020 season. *Viruses*.  
674 2021;13(4):695. doi: 10.3390/v13040695.
- 675 59. Treggiari D, Piubelli C, Formenti F, Silva R, Perandin F. Resurgence of respiratory virus after relaxation  
676 of COVID-19 containment measures: A real-world data study from a regional hospital of Italy. *Int J*  
677 *Microbiol*. 2022;2022:4915678. doi: 10.1155/2022/4915678.
- 678 60. Calderaro A, De Conto F, Buttrini M, Piccolo G, Montecchini S, Maccari C, et al. Human respiratory  
679 viruses, including SARS-CoV-2, circulating in the winter season 2019-2020 in Parma, Northern Italy.  
680 *Int J Infect Dis*. 2021;102:79–84. doi: 10.1016/j.ijid.2020.09.1473.
- 681 61. Milano G, Capitani E, Camarri A, Bova G, Capecchi PL, Lazzeri G, et al. Surveillance of influenza and  
682 other airborne transmission viruses during the 2021/2022 season in hospitalized subjects in Tuscany,  
683 Italy. *Vaccines (Basel)*. 2023;11(4):776. doi: 10.3390/vaccines11040776.
- 684 62. Panatto D, Domnich A, Lai PL, Ogliastro M, Bruzzone B, Galli C, et al. Epidemiology and molecular  
685 characteristics of respiratory syncytial virus (RSV) among Italian community-dwelling adults, 2021/22  
686 season. *BMC Infect Dis*. 2023;23(1):134. doi: 10.1186/s12879-023-08100-7.
- 687 63. Santus P, Radovanovic D, Gismondo MR, Rimoldi SG, Lombardi A, Danzo F, et al. Respiratory  
688 syncytial virus burden and risk factors for severe disease in patients presenting to the emergency  
689 department with flu-like symptoms or acute respiratory failure. *Respir Med*. 2023;218:107404. doi:  
690 10.1016/j.rmed.2023.107404
- 691 64. Boattini M, Almeida A, Christaki E, Marques TM, Tosatto V, Bianco G, et al. Severity of RSV infection  
692 in Southern European elderly patients during two consecutive winter seasons (2017-2018). *J Med*  
693 *Virol*. 2021;93(8):5152–5157. doi: 10.1002/jmv.26938.
- 694 65. Almeida A, Boattini M, Christaki E, Moreira Marques T, Moreira I, Cruz L, et al. Comparative virulence  
695 of seasonal viruses responsible for lower respiratory tract infections: a southern European multi-centre  
696 cohort study of hospital admissions. *Infection*. 2021;49(3):483–490. doi: 10.1007/s15010-020-01569-  
697 3.
- 698 66. Boattini M, Charrier L, Almeida A, Christaki E, Moreira Marques T, Tosatto V, et al. Burden of primary  
699 influenza and respiratory syncytial virus pneumonia in hospitalised adults: insights from a 2-year multi-  
700 centre cohort study (2017-2018). *Intern Med J*. 2023;53(3):404–408. doi: 10.1111/imj.15583.

- 701 67. Sáez-López E, Pechirra P, Costa I, Cristóvão P, Conde P, Machado A, et al. Performance of  
702 surveillance case definitions for respiratory syncytial virus infections through the sentinel influenza  
703 surveillance system, Portugal, 2010 to 2018. *Euro Surveill.* 2019;24:1900140. doi: 10.2807/1560-  
704 7917.ES.2019.24.45.1900140.
- 705 68. Korsten K, Adriaenssens N, Coenen S, Butler CC, Verheij TJM, Bont LJ, et al. World Health  
706 Organization influenza-like illness underestimates the burden of respiratory syncytial virus infection in  
707 community-dwelling older adults. *J Infect Dis.* 2022;226:S71–S78. doi: 10.1093/infdis/jiab452.
- 708 69. McLaughlin JM, Khan F, Begier E, Swerdlow DL, Jodar L, Falsey AR. Rates of medically attended  
709 RSV among US adults: A systematic review and meta-analysis. *Open Forum Infect Dis.*  
710 2022;9(7):ofac300. doi: 10.1093/ofid/ofac300.
- 711 70. Fallani E, Orsi A, Signori A, Icardi G, Domnich A. An exploratory study to assess patterns of influenza-  
712 and pneumonia-related mortality among the Italian elderly. *Hum Vaccin Immunother.*  
713 2021;17(12):5514–5521. doi: 10.1080/21645515.2021.2005381.
- 714 71. Noyola DE, Mandeville PB. Effect of climatological factors on respiratory syncytial virus epidemics.  
715 *Epidemiol Infect.* 2008;136(10):1328–1332. doi: 10.1017/S0950268807000143.
- 716 72. Lee MH, Mailepessov D, Yahya K, Loo LH, Maiwald M, Aik J. Air quality, meteorological variability and  
717 pediatric respiratory syncytial virus infections in Singapore. *Sci Rep.* 2023;13(1):1001. doi:  
718 10.1038/s41598-022-26184-0.
- 719 73. Radhakrishnan D, Ouedraogo A, Shariff SZ, McNally JD, Benchimol EI, Clemens KK. The association  
720 between climate, geography and respiratory syncytial virus hospitalizations among children in Ontario,  
721 Canada: a population-based study. *BMC Infect Dis.* 2020;20(1):157. doi: 10.1186/s12879-020-4882-  
722 6.
- 723 74. Barendregt JJ, Doi SA, Lee YY, Norman RE, Vos T. Meta-analysis of prevalence. *J Epidemiol*  
724 *Community Health.* 2013;67(11):974–978. doi: 10.1136/jech-2013-203104.
- 725 75. Amodio E, Vitale F, d'Angela D, Carrieri C, Polistena B, Spandonaro F, et al. Increased risk of  
726 hospitalization for pneumonia in Italian adults from 2010 to 2019: Scientific evidence for a call to action.  
727 *Vaccines (Basel).* 2023;11(1):187. doi: 10.3390/vaccines11010187.
- 728 76. O'Rourke B, Oortwijn W, Schuller T; International Joint Task Group. The new definition of health  
729 technology assessment: A milestone in international collaboration. *Int J Technol Assess Health Care.*  
730 2020;36(3):187–190. doi: 10.1017/S0266462320000215

- 731 77. Breslau RM, Cohen JT, Diaz J, Malcolm B, Neumann PJ. A review of HTA guidelines on societal and  
732 novel value elements. *Int J Technol Assess Health Care*. 2023;39(1):e31. doi:  
733 10.1017/S026646232300017X.
- 734 78. Bell E, Neri M, Steuten L. Towards a broader assessment of value in vaccines: The BRAVE way  
735 forward. *Appl Health Econ Health Policy*. 2022;20(1):105–117. doi: 10.1007/s40258-021-00683-z.
- 736 79. Calabro' GE, Carini E, Tognetto A, Giacchetta I, Bonanno E, Mariani M, et al. The value(s) of  
737 vaccination: Building the scientific evidence according to a value-based healthcare approach. *Front*  
738 *Public Health*. 2022;10:786662. doi: 10.3389/fpubh.2022.786662.
- 739 80. Beck E, Biundo E, Devlin N, Doherty TM, Garcia-Ruiz AJ, Postma M, et al. Capturing the value of  
740 vaccination within health technology assessment and health economics: Literature review and novel  
741 conceptual framework. *Vaccine*. 2022;40(30):4008–4016. doi: 10.1016/j.vaccine.2022.04.050.
- 742 81. de Waure C, Calabrò GE, Ricciardi W; Value(s) of Vaccination Project Steering Committee.  
743 Recommendations to drive a value-based decision-making on vaccination. *Expert Rev Vaccines*.  
744 2022;21(3):289–296. doi: 10.1080/14760584.2022.2021880.



745 **Supporting information captions**

746

747 **S1 Fig. RSV positivity prevalence among Italian adults of any age, by study period in relation to the**  
748 **COVID-19 pandemic.**

749 **S2 Fig. RSV positivity prevalence among Italian adults of any age, by study geographic area.**

750 **S3 Fig. RSV positivity prevalence among Italian adults of any age, by study sample size.**

751 **S4 Fig. Prevalence of RSV subtype B among Italian adults of any age (prevalence of RSV subtype A**  
752 **may be computed as 1 – prevalence of RSV B).**

753 **S5 Fig. Frequency of viral co-detections among RSV-positive Italian adults of any age.**

754 **S6 Fig. In-hospital mortality among RSV-positive Italian adults of any age.**

755 **S1 Table. PRISMA (Preferred Reporting Items for Systematic reviews and Meta-Analyses) checklist.**

756 **S2 Table. Algorithm for the automatic search, by citation database.**

757 **S3 Table. Excluded studies with reasons.**

758 **S4 Table. Syndromic definitions used the studies analyzed.**

759 **S5 Table. Risk of bias of the studies included according to the Joanna Briggs Institute (JBI) checklist**  
760 **for prevalence/incidence studies.**

761 **S6 Table. RSV positivity prevalence among Italian adults of any age, by setting.**

762 **S7 Table. RSV positivity prevalence among Italian working-age adults, by setting.**

763 **S8 Table. RSV positivity prevalence among Italian older adults, by setting.**

764 **S9 Table. Meta-regression analysis to investigate sources of heterogeneity in RSV positivity**  
765 **prevalence among Italian adults of any age.**

766 **S10 Table. RSV positivity prevalence among Italian adults, by subtype.**

767 **S11 Table. Frequency of viral co-detections among RSV-positive Italian adults of any age.**



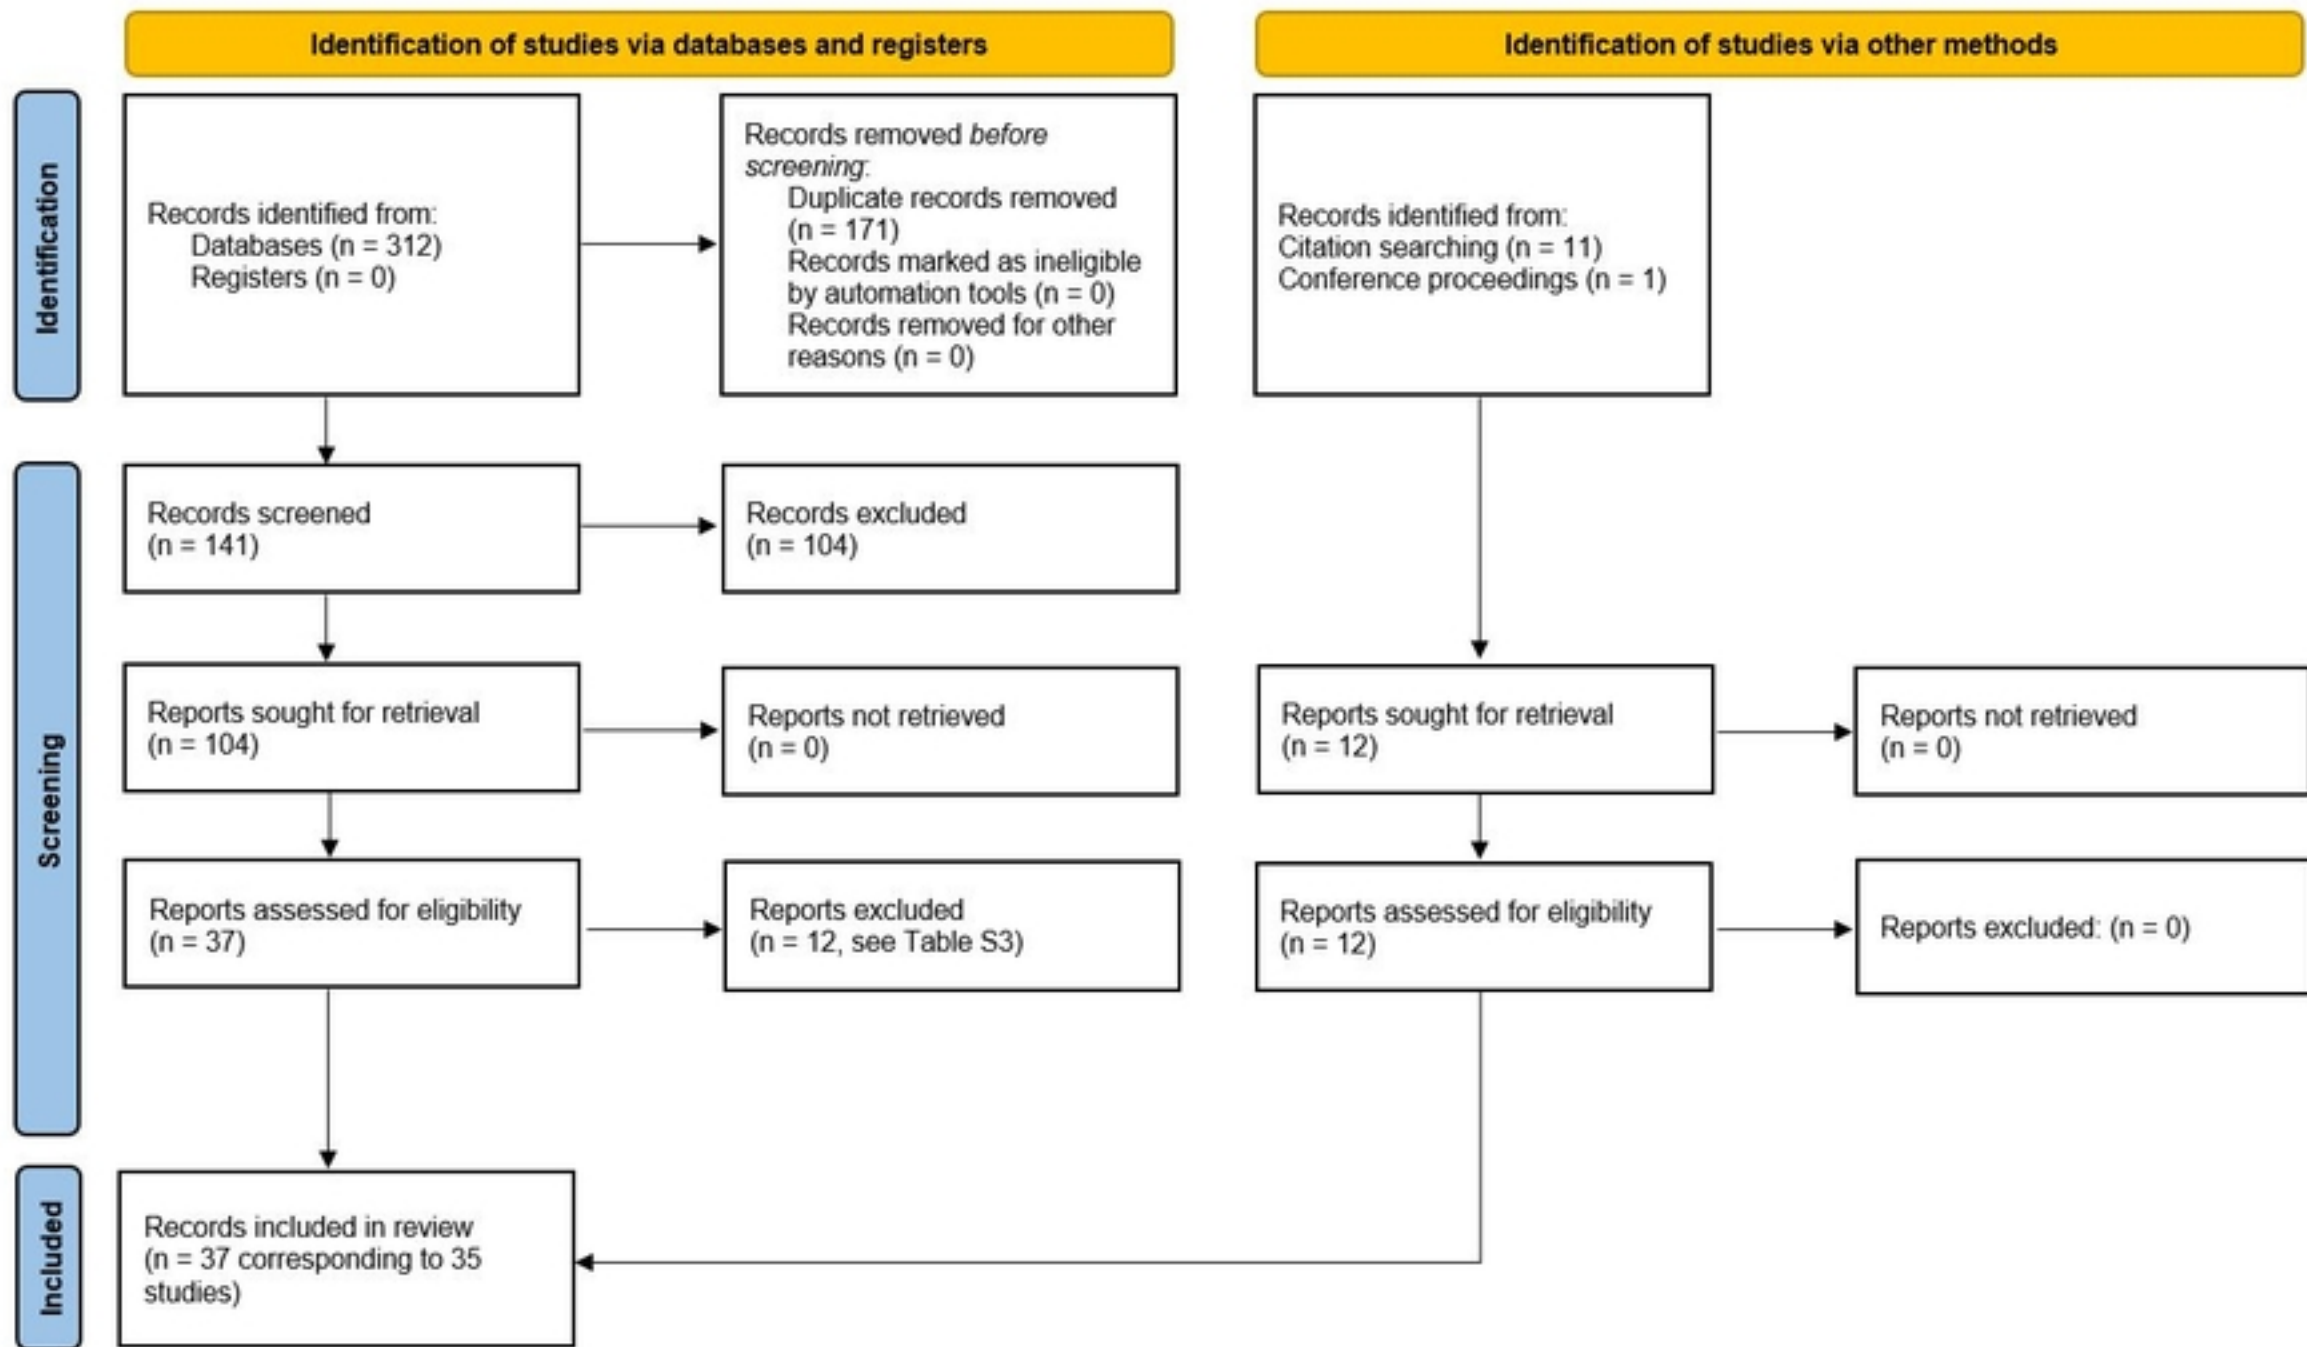

Fig1

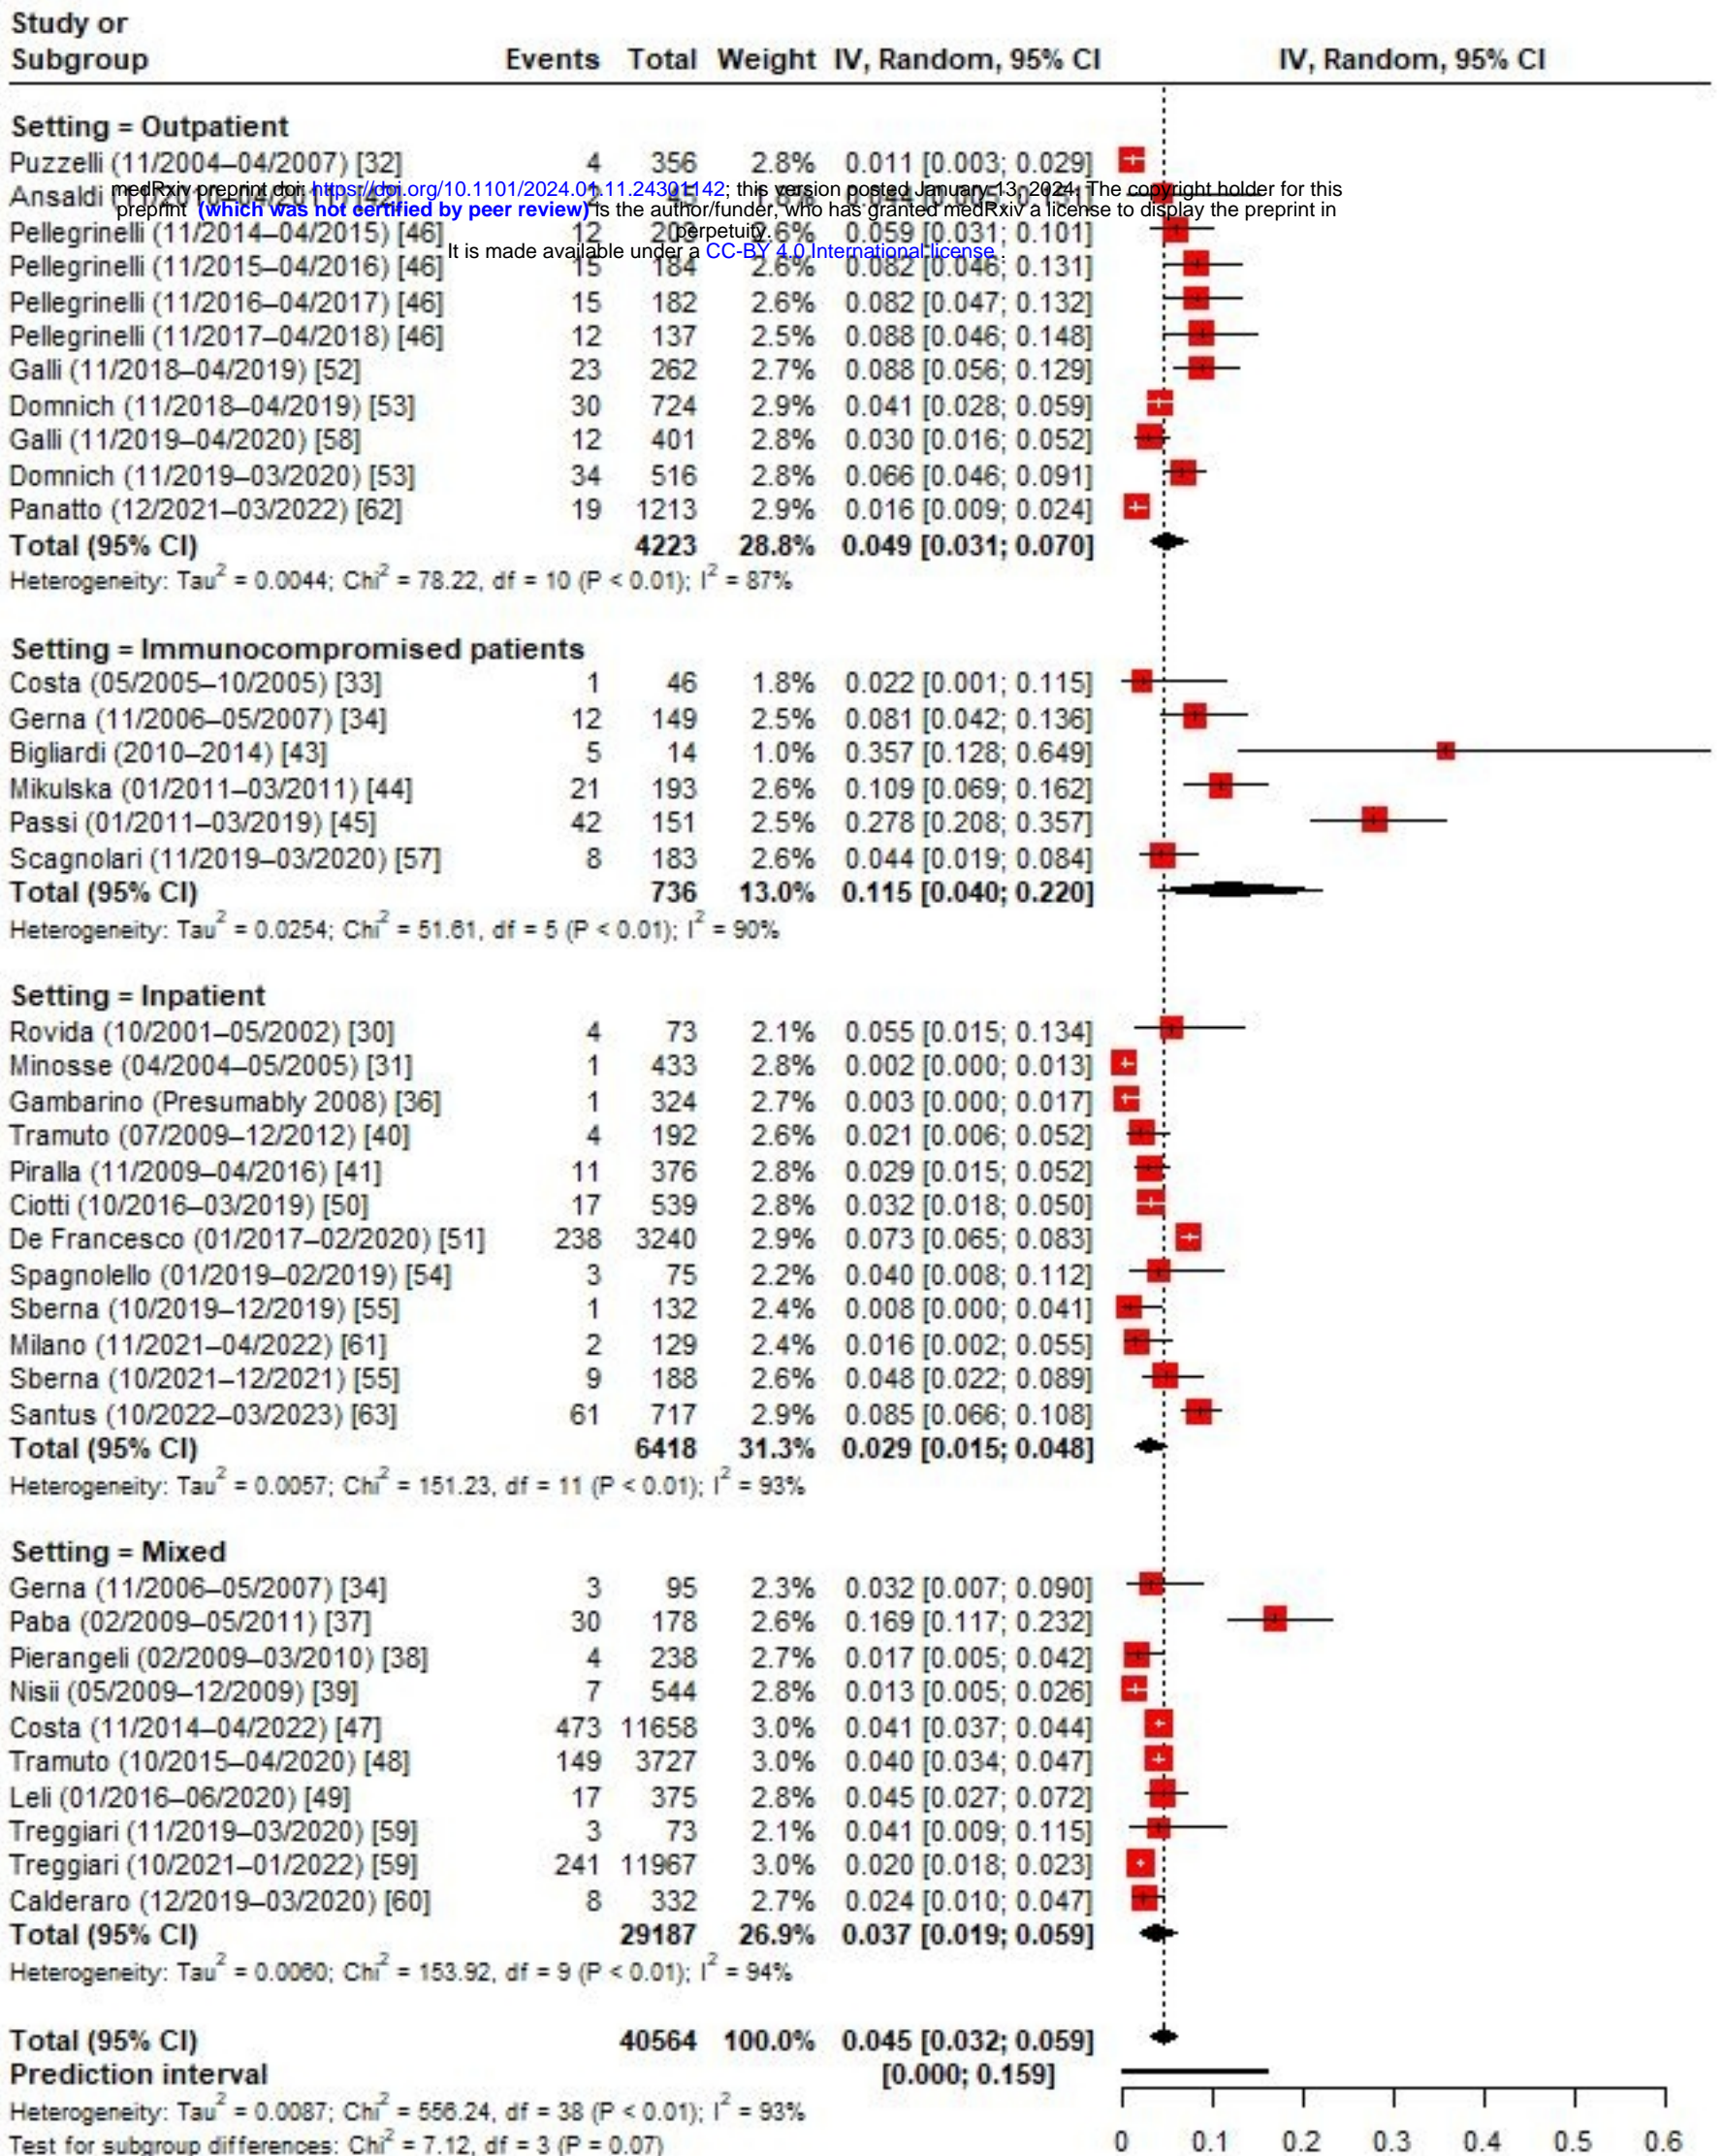

Fig2



## Working-age adults

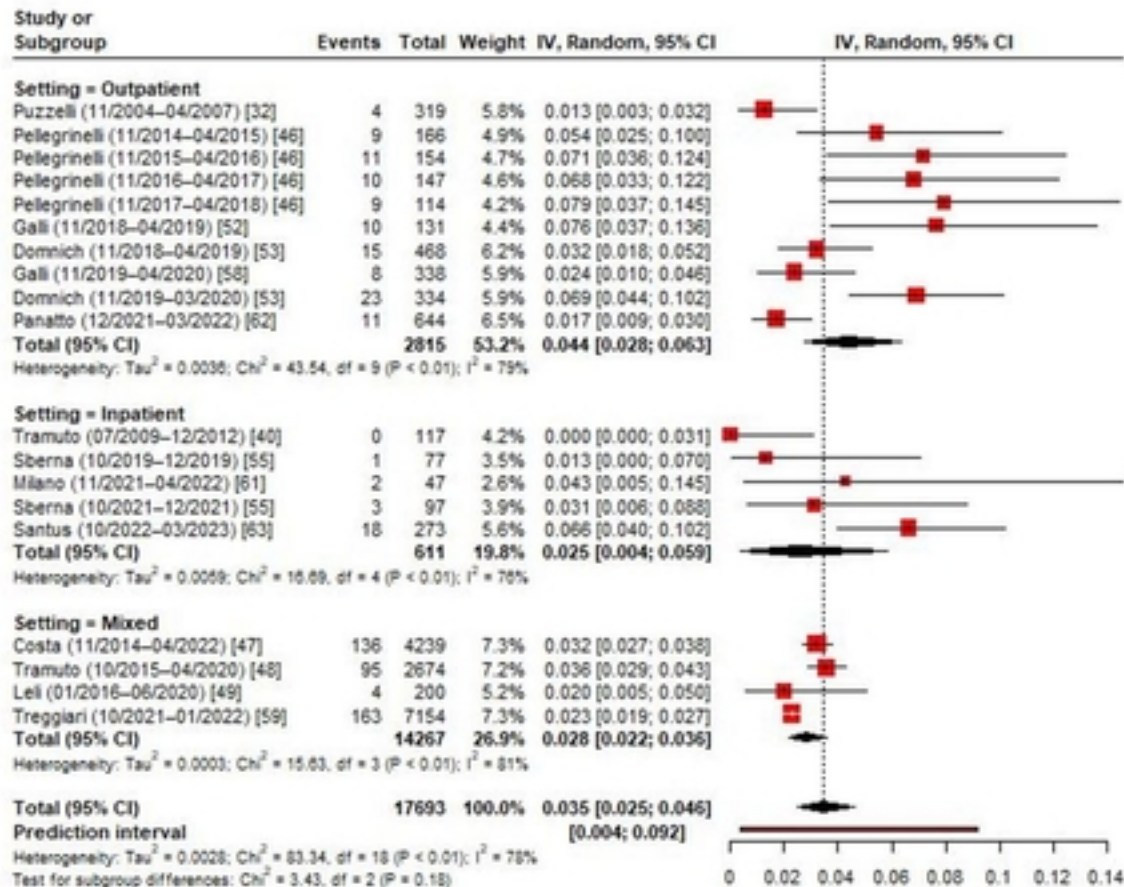

## Older adults

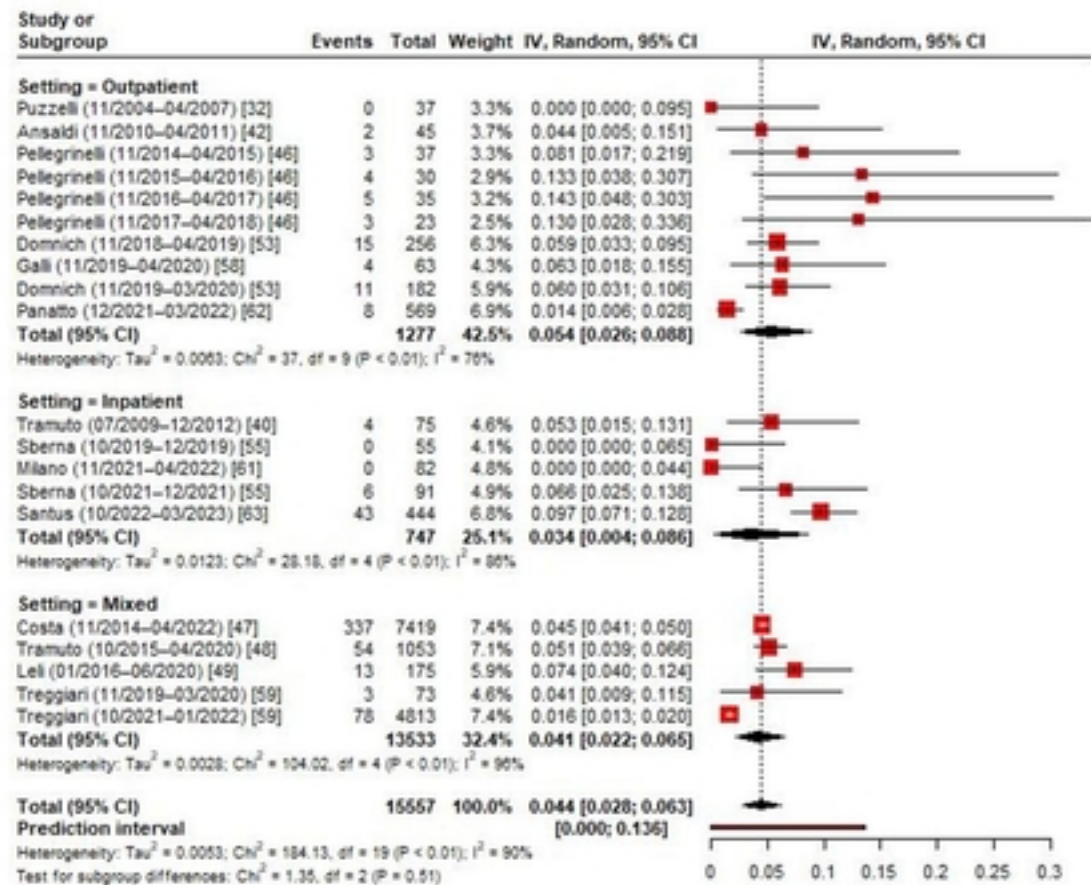

Source: https://medrxiv.org/content/10.1101/2024.01.11.24301142v1.full.pdf
